## 1 **Analysis of long and short enhancers in melanoma cell states**

2

3 **David Mauduit<sup>1,2</sup>, Liesbeth Minnoye<sup>1,2</sup>, Ibrahim Ihsan Taskiran<sup>1,2</sup>, Maxime de**  
4 **Waegeneer<sup>1,2</sup>, Valerie Christiaens<sup>1,2</sup>, Gert Hulselmans<sup>1,2</sup>, Jonas Demeulemeester<sup>1,2,3</sup>, Jasper**  
5 **Wouters<sup>1,2</sup>, and Stein Aerts<sup>1,2,#</sup>**

6 1.VIB-KU Leuven Center for Brain & Disease Research, Leuven, Belgium.

7 2.KU Leuven, Department of Human Genetics KU Leuven, Leuven, Belgium.

8 3.Cancer Genomics Laboratory, The Francis Crick Institute, London, UK.

9 # Correspondence to [stein.aerts@kuleuven.be](mailto:stein.aerts@kuleuven.be)

10

### 11 **Abstract**

12 Understanding how enhancers drive cell type specificity and efficiently identifying them is  
13 essential for the development of innovative therapeutic strategies. In melanoma, the  
14 melanocytic (MEL) and the mesenchymal-like (MES) states present themselves with different  
15 responses to therapy, making the identification of specific enhancers highly relevant. Using  
16 massively parallel reporter assay (MPRA) in a panel of patient-derived melanoma lines (MM  
17 lines), we set to identify and decipher melanoma enhancers by first focusing on regions with  
18 state specific H3K27 acetylation close to differentially expressed genes. A more in-depth  
19 evaluation of those regions was then pursued by investigating the activity of ATAC-seq peaks  
20 found therein along with a full tiling of the acetylated regions with 190 bp sequences. Activity  
21 was observed in more than 60% of the selected regions and we were able to precisely locate  
22 the active regions within ATAC-seq peaks. Comparison of sequence content with activity,  
23 using the deep learning model DeepMEL2, revealed that AP-1 alone is responsible for the MES  
24 enhancer activity, while SOX and MITF both influence MEL enhancer activity with SOX being  
25 required to achieve high levels of activity. Overall, our MPRA assays shed light on the  
26 relationship between long and short sequences in terms of their sequence content, enhancer  
27 activity, and specificity as reporters across melanoma cell states.

## 28 **Introduction**

29 Enhancers are crucial regulatory regions in the genome that control cell type-specific gene  
30 expression. Identifying enhancers helps to better understand cell identity and is key to  
31 develop therapies targeting a singular relevant cell type in a disease. To date, the accurate  
32 prediction of enhancer location and activity in a given cell type remains a challenge. Both the  
33 presence and clustering of transcription factor binding sites (TFBSs) are good predictors of  
34 enhancer activity (Gasperini et al., 2020; King et al., 2020). Yet, such an approach requires  
35 prior knowledge of the cis-regulatory grammar in the studied cell types as only a small  
36 proportion of the TFBSs found in the genome are bound by the corresponding transcription  
37 factor (TF) (Yáñez-Cuna et al., 2012). Another strategy to identify candidate enhancers is to  
38 use active enhancer marks such as H3K27ac and chromatin accessibility (Gray et al., 2017;  
39 Minnoye et al., 2021; Rada-Iglesias et al., 2011). The most successful studies, combining this  
40 approach with transcriptome data, generated libraries with up to 60% of active enhancers in  
41 the target cell type (Gorkin et al., 2020; Graybuck et al., 2021). Massively parallel reporter  
42 assays (MPRA) have been developed to screen the activity of thousands of sequences  
43 simultaneously (Inoue and Ahituv, 2015; Melnikov et al., 2012; White et al., 2013). However,  
44 limitations of sequence synthesis constrain one to choose either a large number of short  
45 sequences (e.g., thousands of sequences of 150-250 bp) or a small number of longer  
46 sequences (e.g., dozens of sequences of 500-1000 bp)(Inoue and Ahituv, 2015). This issue,  
47 combined with the difficulty to identify putative enhancers, leads to a low rate of active  
48 enhancers in MPRA.

49 Here, we study enhancer location, specificity and regulatory grammar in melanoma, using a  
50 variety of MPRA strategies. Melanoma exhibits pronounced heterogeneity within and  
51 between patients (Grzywa et al., 2017). Two main subtypes or cell states are discernable,  
52 melanocytic (MEL) and mesenchymal-like (MES) (Hoek et al., 2008, 2006; Verfaillie et al.,  
53 2015), as well as more recently identified variants of the MEL state, such as the neural-crest  
54 like and intermediate states (Rambow et al., 2018; Tsoi et al., 2018; Wouters et al., 2020).  
55 MEL and MES subtypes display distinct epigenomic and transcriptomic profiles resulting in  
56 divergent phenotypes (e.g., migration; Wouters et al., 2020), and different responses to  
57 therapy (Verfaillie et al., 2015). Thus, the identification of subtype-specific enhancers may be  
58 relevant for therapy, where it could improve safety and efficiency by narrowing down the  
59 effect of the treatment to a specific population. Comparisons between MEL and MES yield  
60 thousands of regions with differential acetylation (H3K27ac) and accessibility. However, it  
61 remains unclear which of these subtype-specific regions function as active enhancers and  
62 which TFs are responsible for their activity.

63 In this study, we analyzed MEL- and MES-specific regions identified based on differential  
64 H3K27ac chromatin immunoprecipitation sequencing (ChIP-seq) signal nearby differentially  
65 expressed genes. We designed MPRA experiments to test those regions at three different  
66 levels in a panel of patient-derived malignant melanoma (MM) lines. Our results precisely  
67 locate the origins of enhancer activity within the larger H3K27ac domains. In addition, we can  
68 accurately predict their subtype specificity, and ultimately identify a set of rules governing

69 MEL and MES enhancer activity. Furthermore, we show that a melanoma deep learning model  
70 (DeepMEL2; Atak et al., 2021) trained on ATAC-seq data pinpoints which TFBSs drive enhancer  
71 activity and specificity.

72

## 73 **Results**

### 74 **Design of MPRA libraries based on H3K27ac, ATAC-seq, and synthetic sequences**

75 H3K27ac ChIP-seq peaks are often used for the selection of candidate enhancers (Creyghton  
76 et al., 2010; Fox et al., 2020; Fu et al., 2018). However, such peaks can encompass large  
77 genomic regions, often 2-3 kb long, while enhancers are usually only a few hundred base pairs  
78 in size (Gasperini et al., 2020; Li and Wunderlich, 2017). To investigate the relationship  
79 between H3K27ac signal, chromatin accessibility peaks, and enhancer activity, we designed  
80 MPRA libraries at three different levels: 1.2 to 2.9kb sized H3K27ac ChIP-seq peaks, 501bp  
81 sized ATAC-seq peaks that fall within the H3K27ac regions, and 190 bp subsequences tiling  
82 the entire H3K27ac regions.

83 We designed the H3K27ac ChIP-seq based library (H3K27ac library) by selecting regions that  
84 are specifically acetylated in either the MEL or the MES melanoma cell state and located  
85 around differentially expressed genes in a panel of 12 melanoma lines: 3 MES lines (MM029,  
86 MM047 and MM099) and 9 MEL lines that cover a spectrum from pure-melanocytic to  
87 intermediate melanoma (MM001, MM011, MM031, MM034, MM057, MM074, MM087,  
88 MM118, SKMEL5) (See Methods, Fig 1a.; Minnoye et al., 2020). A special consideration was  
89 given to regions overlapping with ChIP-seq peaks for SOX10 and MITF (for MEL regions) or AP-  
90 1 (JUN and JUNB; for MES regions), known regulators of each state. A total of 35 MES- and 18  
91 MEL-specific regions, with an average size of 1,987 bp, were amplified from genomic DNA  
92 (Supplementary Table 1). The H3K27ac ChIP-seq signal across the selected regions displays a  
93 good correlation between cell lines of the same subtype and a negative correlation between  
94 cell lines of a different subtype (Supplementary Fig 1a.). This correlation is also observed in  
95 the ATAC-seq signal and the target gene expression (Supplementary Fig 1b.,c.,g.). We created  
96 two vector libraries based on the specific CHEQ-seq vector backbone (Verfaillie et al., 2016),  
97 by cloning the sequences upstream (5' position) or downstream (intron position) of a minimal  
98 promoter (SCP1, see Methods, Fig 1b. left panel).

99 Next, we designed a second library consisting of the ATAC-seq peaks contained within the  
100 H3K27ac library regions (Fig 1a.). In some cases, two peaks were selected within the same  
101 region. Each sequence was defined by taking the summit of the ATAC-seq peak and extending  
102 250 bp on each side, resulting in a 501 bp candidate sequence. 28 MES- and 18 MEL-specific  
103 ATAC-seq peaks were selected. The correlation of the H3K27ac ChIP-seq, ATAC-seq and RNA-  
104 seq signal between the different cell lines remains the same as for the H3K27ac library  
105 (Supplementary Fig 1d.-f.). We cloned the regions in the CHEQ-seq vector, upstream of the  
106 SCP1 promoter (Fig 1b. upper right panel). In addition, we cloned the same set of sequences  
107 in the STARR-seq vector (an alternative MPRA vector) to assess assay-related variability  
108 (Muerdter et al., 2017).

109 Finally, to locate the precise origin of enhancer activity, we generated two tiling libraries (A  
110 and B, see Methods), encompassing the entire H3K27ac regions. The tiles are 190 bp long  
111 with a 20 bp shift between consecutive tiles. The tiling for library A starts at nucleotide  
112 position 1 of the H3K27ac ChIP-seq regions while library B starts at position 11, resulting in a  
113 final tiling resolution of 10 bp when both sub-libraries are taken into account.  
114 In order to probe the effect of mutations within putative TFBSs, we used Cluster-Buster  
115 (cbust; Frith et al., 2003) with position weight matrices for binding sites of key regulators of  
116 MEL (SOX10, MITF, TFAP2A) and MES (AP-1 and TEAD) (Wouters et al., 2020) to identify TFBSs  
117 present in the sequences of the H3K27ac library. We generated tiles with mutated versions  
118 of these motifs (See Methods). For each sub-library, 800 shuffled tiles were generated as  
119 negative controls, resulting in a total of 7,412 and 7,356 tiles for sub-library A and B,  
120 respectively (Fig 1a.). Each sub-library is separately cloned upstream of the SCP1 promoter in  
121 the CHEQ-seq vector and is transfected individually (Fig 1b. lower right panel).  
122

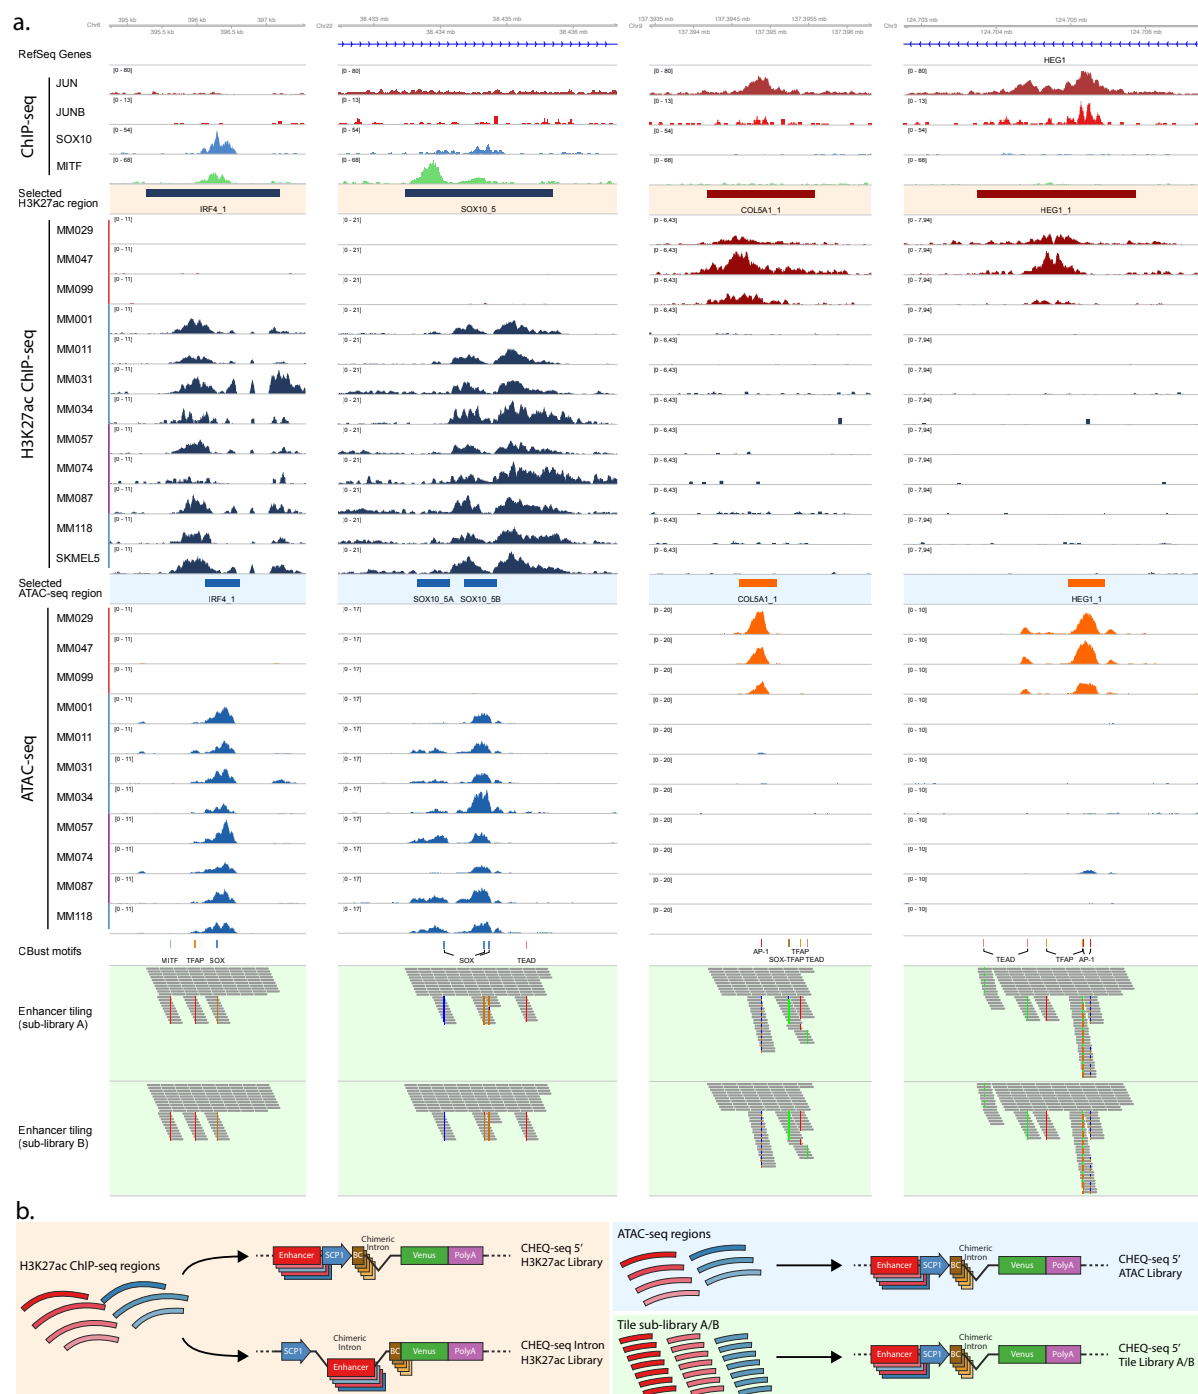

123  
 124 **Figure 1: a.**, Cell state-specific regions were selected based on H3K27ac ChIP-seq signal from a panel of  
 125 melanoma cell lines containing both MES (red bar) and MEL lines (pure MEL: blue bar and intermediate MEL:  
 126 purple bar). ATAC-seq data from the same lines was used to identify accessibility peaks within these regions.  
 127 Finally, the regions were tiled with 190 bp tiles with a shift of 20 bp (sub-library A). Sub-library B was generated  
 128 by shifting all tiles 10 bp downstream. CBust was used to identify TF motifs and new tiles were generated with  
 129 mutated motifs. **b.**, Reporter vector configurations used for the evaluation of the H3K27ac enhancers (left panel),  
 130 the ATAC-seq enhancers (top right panel) and the enhancer tiling (bottom right panel). SCP1: Super Core  
 131 Promoter 1, BC: Barcode.

132  
 133  
 134

### 135 **Most MEL-specific acetylated regions harbour enhancer activity in MEL lines**

136 We first transfected all MPRA libraries in the most melanocytic (MEL) line, MM001 (Minnoye  
137 et al., 2020; Wouters et al., 2020). Of the MEL-specific H3K27ac regions, 75% (14/18) display  
138 significant enhancer activity (Benjamini–Hochberg adjusted p-values < 0.05, see Methods) in  
139 MM001 with a mean log<sub>2</sub> fold change (FC) of 0.23, compared to 26% (8/32) for the MES-  
140 specific regions with a mean log<sub>2</sub> FC of -1.21 (Fig 2a.). The activities are consistent across the  
141 two library designs (enhancers cloned into the intron or upstream of the TSS; Supplementary  
142 Fig 2a.-b.). The library where only the ATAC-seq peaks were cloned recapitulates these  
143 activities, suggesting that the enhancer activity is contained within the sequence of the ATAC-  
144 seq peak (Fig 2b., Supplementary Fig 2c.-e.). Interestingly, in the five MEL-specific H3K27ac  
145 regions where two ATAC-seq peaks were assessed, only one of the two recapitulates the  
146 activity of the encompassing region (Supplementary Fig 3). This was independently confirmed  
147 using the STARR-seq MPRA (Supplementary Fig 2c.).

148 Next, we examined the activity of all 190 bp sequences tiled along the entire H3K27ac regions.  
149 We confirmed that the majority of active tiles (92.2%) are located within an ATAC-seq peak  
150 (Fig 2c.-d.; Supplementary Fig 3) and identified active tiles in 7 out of the 10 most active MEL  
151 ATAC-seq based enhancers. Short 190 bp regions can thus often recapitulate the enhancer  
152 activity of the larger encompassing region. When two or more consecutive tiles, that are  
153 shifted 20bp, are active, the enhancer may be contained in an even smaller sequence or the  
154 activity is coming from independently active elements close to one another.

155 We recently trained a deep learning model on cis-regulatory topics from 30 melanoma lines,  
156 called DeepMEL2, that accurately predicts the accessibility and activity of a sequence in the  
157 different melanoma subtypes (Atak et al., 2021). Each topic used to train the model regrouped  
158 accessible regions found in one cell line, in a specific subtype or in all cell lines. Two topics are  
159 associated with the MEL subtype, topic 16 and 17, mostly focused on SOX and MITF motifs  
160 respectively. We scored our 190 bp tiles with DeepMEL2 and found high MEL prediction  
161 scores (>0.10, see Methods) specifically within ATAC-seq peaks (Fig 2d.). Of those top  
162 DeepMEL2 predictions for MEL specific topics, 11% (Topic 16) and 17.3% (Topic 17) are active  
163 tiles in the MPRA (with 0.25/0.375 recall and 0.11/0.173 precision for topic 16 and 17  
164 respectively). These low precision values may be explained by the fact that the DeepMEL2  
165 model was trained on ATAC-seq data, thus yielding high prediction scores within ATAC-seq  
166 peaks, yet not all of these show positive MPRA activity.

167 In some cases, we identified multiple acetylated regions near one gene. For the tyrosinase  
168 (*TYR*) gene, expressed specifically in MEL lines (Supplementary Fig 1g.), three regions were  
169 selected as MEL-specific and tested at the acetylation, accessibility and tiling levels (Fig 2c.).  
170 *TYR*\_1 and *TYR*\_2 regions display high reporter activity which is subsequently found in the  
171 selected ATAC-seq peak. Activity is further found in tiles at the same location as the  
172 DeepMEL2 predictions (Fig 2c.). The *TYR*\_3 region, at the gene's promoter site, has a low  
173 activity that is also not found when tiling the enhancer, despite the DeepMEL2 predictions.  
174 Those findings suggest that *TYR* expression in MEL lines is largely dependent on the activity  
175 of distal enhancers.

176 Some other enhancers that are active in the H3K27ac and ATAC-seq libraries, are not  
177 recapitulated in the tile library (e.g. SOX10\_3 Supplementary Fig 3c.). This can be due to  
178 technical reasons, such as the small size of the tiles. Nevertheless, from the combination of  
179 the ATAC-seq and enhancer tiling MPRA we can conclude that not all subtype-specific ATAC-  
180 seq peaks function as a standalone enhancer.

181 We finally compared signals of H3K27ac ChIP-seq mean score, ATAC-seq mean score and their  
182 corresponding MPRA signals (Fig 2e.-f.). With the H3K27ac library (Fig 2e.), the acetylation  
183 signal measured over the selected regions correlates well with the accessibility signal  
184 (Pearson's correlation  $r = 0.77$ ) indicating that ATAC-seq peaks are found within the selected  
185 acetylated regions and maintain the same differential signal. Active enhancers are found in  
186 the majority (14/18) of the MEL-specific acetylation regions with ATAC-seq signal. This trend  
187 is also visible in the ATAC-seq based library, with most of the active enhancers detected in  
188 ATAC-seq peaks (13/19) (Fig 2f.). However, the moderate correlation between ATAC-seq  
189 signal and CHEQ-seq activity in the corresponding library (Spearman's  $\rho = 0.48$ ) also  
190 indicates that the peak mean signal is not a good predictor of the activity level of an enhancer.  
191 In part, this may be due to confounding of ATAC and H3K27ac read depth by genomic copy  
192 number aberrations. Also, the activity displayed by some MES-specific regions lacking ATAC-  
193 seq signal in MM001 suggests that closed regions in the genome can still harbour activity in  
194 an episomal MPRA assay.

195 In conclusion, our enhancer selection resulted in a high rate of active enhancers in MM001  
196 and the design of our MPRA libraries allowed us to precisely pinpoint the origins of, at least  
197 part of, the enhancer activity.

198

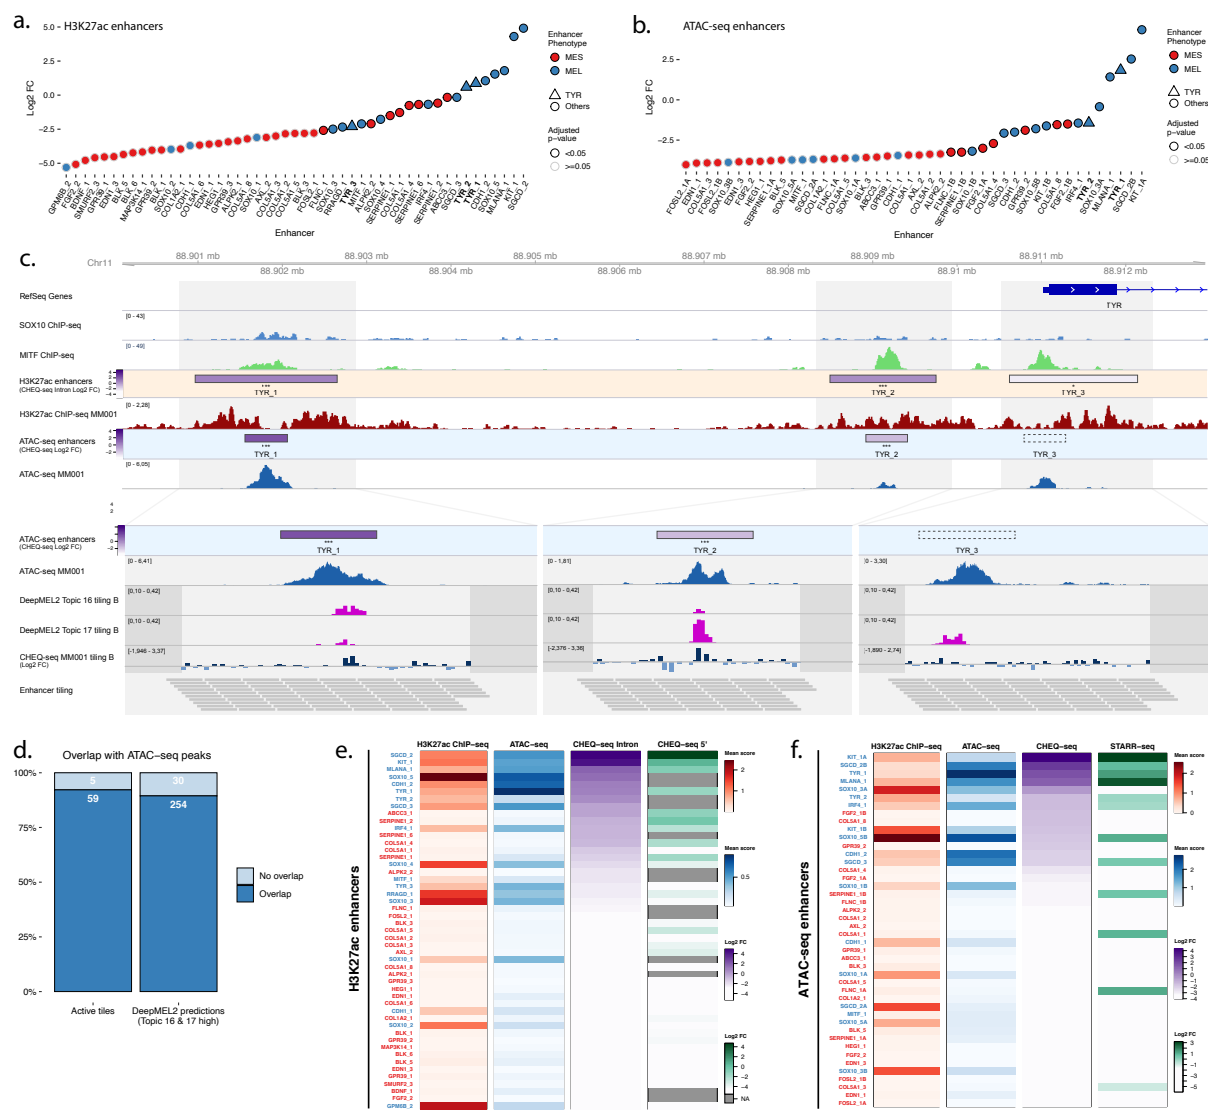

199  
 200 **Figure 2: Enhancer activity in MM001.** *a.-b.*, Enhancer activity profile for the CHEQ-seq intron H3K27ac library  
 201 (*a.*) and CHEQ-seq ATAC-seq library (*b.*). Enhancer regions displayed in panel *c.* have their name indicated in bold  
 202 and their value is displayed with a triangle. *c.*, Enhancer activity of regions selected around the TYR genes. SOX10  
 203 and MITF ChIP-seq as well as H3K27ac ChIP-seq and ATAC-seq for MM001 are displayed and, in the zoomed-in  
 204 regions (light grey areas), DeepMEL2 predictions and CHEQ-seq values of the enhancer tiling B library are  
 205 represented. Dark grey areas are regions not covered by a tile. CHEQ-seq activity is visible in the ‘H3K27ac  
 206 enhancers’ and ‘ATAC-seq enhancers’ tracks. Benjamini–Hochberg adjusted p-values: \* < 0.05; \*\*\* < 0.001.  
 207 Dashed box: region not recovered following DNA synthesis, cloning or MPRA assay. *d.*, Percentage of overlap  
 208 between active tiles and ATAC-seq peaks (left) and high DeepMEL2 predictions with ATAC-seq peaks (right). *e.-*  
 209 *f.*, Heatmaps of H3K27ac library (*e.*) and ATAC-seq library (*f.*), displaying H3K27ac ChIP-seq signal, ATAC-seq  
 210 signal and enhancer activity in MM001 ordered by MPRA values. Only MPRA values of significantly active  
 211 enhancers are displayed.

212  
 213 **MES-specific H3K27ac/ATAC regions are active in MES lines**

214 Next, we transfected all libraries in the MES line MM029. The activity profiles in this line show  
 215 that, as expected, the majority of MES enhancers display activity at both the H3K27ac and  
 216 ATAC-seq level (Fig 3a.,b.; Supplementary Fig 4a.-e.). In regions with two selected ATAC-seq



217 peaks, both MPRA approaches agree, once again, on which peak is driving activity (Fig 3b.,d.;  
218 Supplementary Fig 4c.; Supplementary Fig 5).

219 Multiple regions around the Collagen Type V Alpha 1 Chain (*COL5A1*) gene were found  
220 specifically acetylated in MES lines, up to 100kb upstream of the TSS, and we included a total  
221 of seven into the library (Fig 3c.). Four regions showed significant activity in MM029 (Fig 3c.).  
222 This activity is further confirmed in the ATAC-seq and tiling libraries: the ATAC-seq peaks  
223 within the four active H3K27ac regions are all active, while the ATAC-seq peaks within the  
224 three negative H3K27ac regions are all negative. In the *COL5A1\_5* region, tiling suggests the  
225 presence of three distinct enhancers, including two that are located within small ATAC-seq  
226 peaks that were not selected for the ATAC-seq based library.

227 DeepMEL2 is trained on both MEL and MES accessible regions, and topic 19 has been shown  
228 to be the best performing MES topic (Atak et al., 2021). In our data, topic 19 high predictions  
229 often (18.1%) overlap with active tiles in MM029 (0.181 precision, 0.537 recall, Fig 3c.-d.).  
230 Because several other cis-regulatory topics contribute to the prediction of the MES subtype,  
231 some tiles do not display a high prediction score for topic 19 despite their activity and can be  
232 better explained by other topics.

233 The small shift between each tile and the use of two overlapping libraries provides a high  
234 number of measurements throughout the regions which allows for the more accurate  
235 detection of lowly active enhancers. Such enhancers are found in the *SERPINE1\_1* region,  
236 where the *SERPINE1\_1A* ATAC-seq peak is inactive in the CHEQ-seq and STARR-seq assays (Fig  
237 3d., Supplementary Fig 4c.) but the tiling assay shows robust enhancer activity. Of the two  
238 ATAC-seq peaks in the *FOSL2\_1* region, neither one recapitulates the activity of the acetylated  
239 region. In contrast, the tiling assay reveals clear enhancer activity in both peaks  
240 (Supplementary Fig 5b.).

241 Similar conclusions to those above for MEL enhancers, can now be drawn for MES regions  
242 regarding the relationship between H3K27ac, ATAC-seq signal and enhancer activity (Fig 3e.-  
243 f.). ATAC-seq based and tiling CHEQ-seq assays show that most active enhancers in the  
244 H3K27Ac regions reside within ATAC-seq peaks (151/164 active tiles are found in ATAC-seq  
245 peaks; 92.1%). Irrespective, ATAC-seq peak mean signal remains a poor predictor of the level  
246 of enhancer activity, at least as read out by CHEQ-seq. Moreover, the presence of a  
247 differentially accessible ATAC-seq peak does not guarantee enhancer function. Indeed, of 26  
248 differentially accessible peaks, only 14 show demonstrable activity (54%).

249 In conclusion, MPRA assays performed in MM001 and MM029 have shown a high success  
250 rate of MEL and MES selected regions to display activity specifically in their corresponding cell  
251 state. However, MM001 and MM029 lie at the extremes of the MEL-MES spectrum. To further  
252 investigate how the activity of the selected regions scales along this axis, we studied them in  
253 five additional melanoma cell lines, representing more intermediate or transitory melanoma  
254 states (Tsoi et al., 2018; Wouters et al., 2020).

255

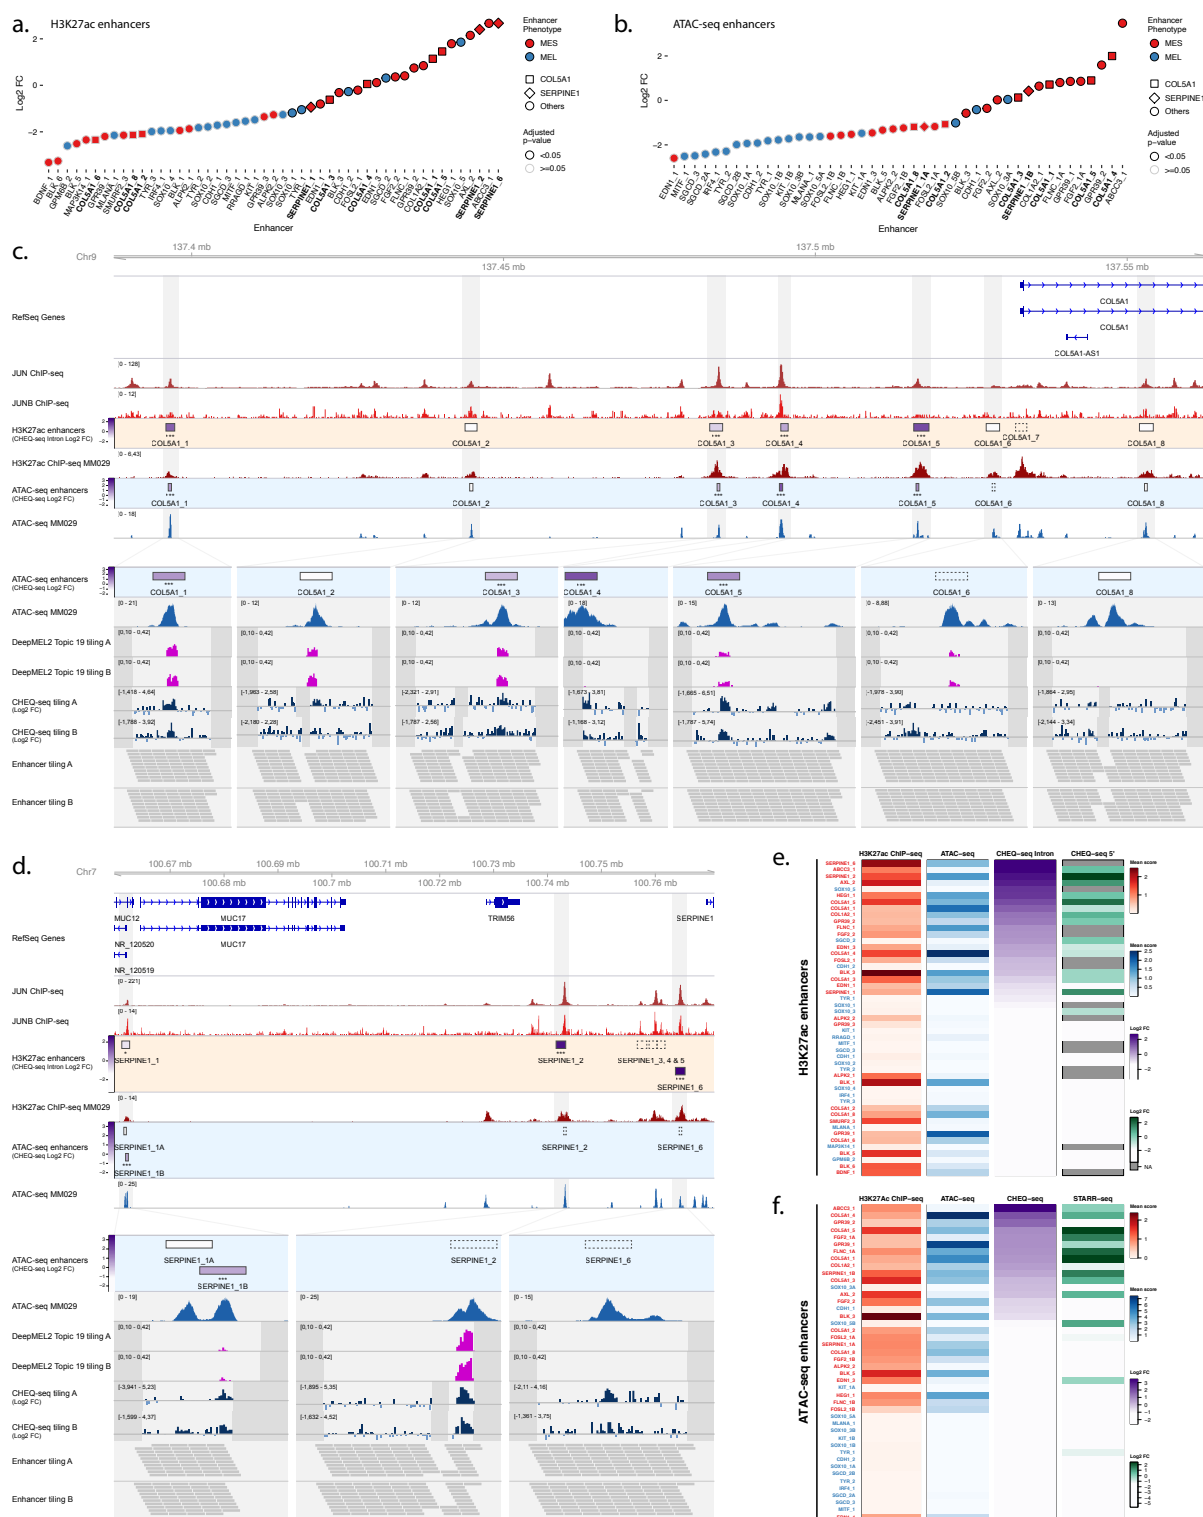

256  
 257 **Figure 3: Enhancer activity in MM029.** Enhancer activity profile for the CHEQ-seq intron H3K27ac library (**a.**) and  
 258 CHEQ-seq ATAC-seq library (**b.**). Enhancer regions displayed in panel **c.** and **d.** have their name indicated in bold  
 259 and their value is displayed with a different shape. Enhancer activity of regions selected around the COL5A1 (**c.**)  
 260 and SERPINE1 (**d.**) genes. JUN and JUNB ChIP-seq and H3K27ac ChIP-seq and ATAC-seq for MM029 are displayed  
 261 and, in the zoomed-in regions (light grey areas), DeepMEL2 predictions and CHEQ-seq values of the enhancer  
 262 tiling are represented. Dark grey areas are regions not covered by the tiling library. CHEQ-seq activity is visible in  
 263 the ‘H3K27ac enhancers’ and ‘ATAC-seq enhancers’ tracks. Benjamini–Hochberg adjusted p-values: \* < 0.05; \*\*\*  
 264 < 0.001. Dashed boxes: regions not recovered following DNA synthesis, cloning or MPRA assay. Heatmaps of

265 *H3K27ac library (f.) and ATAC-seq library (g.), displaying H3K27ac ChIP-seq signal, ATAC-seq signal and enhancer*  
266 *activity in MM001 ordered by MPRA values. Only MPRA values of significantly active enhancers are displayed.*

267

### 268 **MES enhancers show lower but consistent activity in intermediate lines**

269 To further study the behaviour of melanoma enhancers, we expanded our panel of cell lines  
270 to include two additional MES lines (MM047 and MM099) and three MEL-intermediate lines  
271 (MM057, MM074 and MM087). These three lines have high SOX10 and MITF expression  
272 (hallmarks of the MEL subtype), yet also show both marker expression and phenotypic  
273 characteristics typical for the MES subtype (e.g., AXL expression, TGF $\beta$ 1 signalling activity)  
274 (Tsoi et al., 2018). Furthermore, in contrast to MM001, these lines shift toward a MES subtype  
275 when SOX10 expression is lost (Wouters et al., 2020). MM057, MM074 and MM087 were part  
276 of the cell lines used for the selection of MEL-specific H3K27ac ChIP-seq regions. As such, they  
277 display an acetylation and accessibility profile as well as a transcriptional activity of the  
278 associated genes similar to MM001 (Supplementary Fig 1a.-c.). Based on those observations,  
279 even though phenotypically different, the MEL intermediate lines were expected to have an  
280 enhancer profile closely related to what we have observed with MM001.

281 The enhancer activity profile for the H3K27ac library obtained in intermediate lines correlates  
282 well with MM001, except for MM074 which moderately correlates with all lines (Fig 4a.).  
283 Interestingly, intermediate lines have the same proportion of active MEL enhancers as  
284 MM001 and the same proportion of active MES enhancers as the MES lines (Fig 4b.). When  
285 looking at the mean activity of each enhancer per cell line phenotype (Fig 4c.), we found a  
286 good correlation of MES region activity between all phenotypes (MES vs MM001  $r = 0.64$ ; MES  
287 vs Intermediate  $r = 0.89$ ). The only difference resides in the strength of the enhancer activity  
288 where MM001 has very low activity and intermediate lines have moderate activity for MES  
289 regions.

290 The comparison of enhancer activity between subtypes highlights a particular case of the  
291 SOX10\_5 region, a MEL-specific H3K27Ac region with enhancer activity in all cell lines (Fig 4c.).  
292 Based on the tiling profile of that region across all tested lines (Supplementary Fig 6a.), we  
293 can identify two active enhancers. One enhancer, located within the largest ATAC-seq peak,  
294 is MEL-specific and overlaps with the DeepMEL2 predictions for MEL accessibility (Green  
295 highlight, Supplementary Fig 6a.). The other one is located just downstream in a GC rich region  
296 and displays activity in all cell lines (Red highlight, Supplementary Fig 6b.). This profile explains  
297 why the SOX10\_5B ATAC-seq region, which does not fully cover this GC rich region, is less  
298 active in MES lines (Fig 4f.).

299 With the ATAC-seq region library, the correlation between lines remains the same with a clear  
300 separation of the MEL and MES lines and the same pattern in the proportion of active  
301 enhancers (Fig 4d.-e.). The overall lower percentage of active MEL enhancers can be explained  
302 by the high proportion of regions with two peaks selected, where most of the time only one  
303 is active. As in the H3K27Ac library, the MES enhancer activity is higher in intermediate lines  
304 than in MM001 but much lower than in MES lines (Fig 4f.).

305 At the tiling level, intermediate lines show an increased MES enhancer activity to a level  
 306 similar to the MES lines (Fig 4g.-i.). This results in a reduced correlation with MM001 despite  
 307 a maintained strong activity of MEL enhancers. As observed in the specific part of the  
 308 SOX10\_5 region (Supplementary fig 6a.), most active MEL regions have a good specificity with  
 309 no activity in MES lines. On the contrary, MES enhancers display a similar activity in MES lines  
 310 and intermediate lines (Fig 4i.; Supplementary fig 6c.).

311 In summary, MEL enhancers display a consistent and specific activity in MEL lines while MES  
 312 enhancers are not only active in MES lines but also in intermediate lines and to a lesser extent  
 313 in MM001. This behaviour suggests that enhancer activity is driven by the expression of TFs  
 314 responsible for the MEL and MES subtypes. SOX10, MITF and TFAP have been identified as  
 315 drivers of the MEL state and AP-1 and TEAD of the MES state (Verfaillie et al., 2015). MM029  
 316 expresses MITF at a low level but it does not seem sufficient to drive the activity of MEL  
 317 enhancers, suggesting that MITF alone cannot induce enhancer activity or that the expressed  
 318 isoform in MM029 cannot bind the TFBS or activate the enhancer.

319 We will next investigate, for each state, which TFs are responsible for enhancer activity and  
 320 whether a cis-regulatory grammar regulating the activity level can be observed.

321

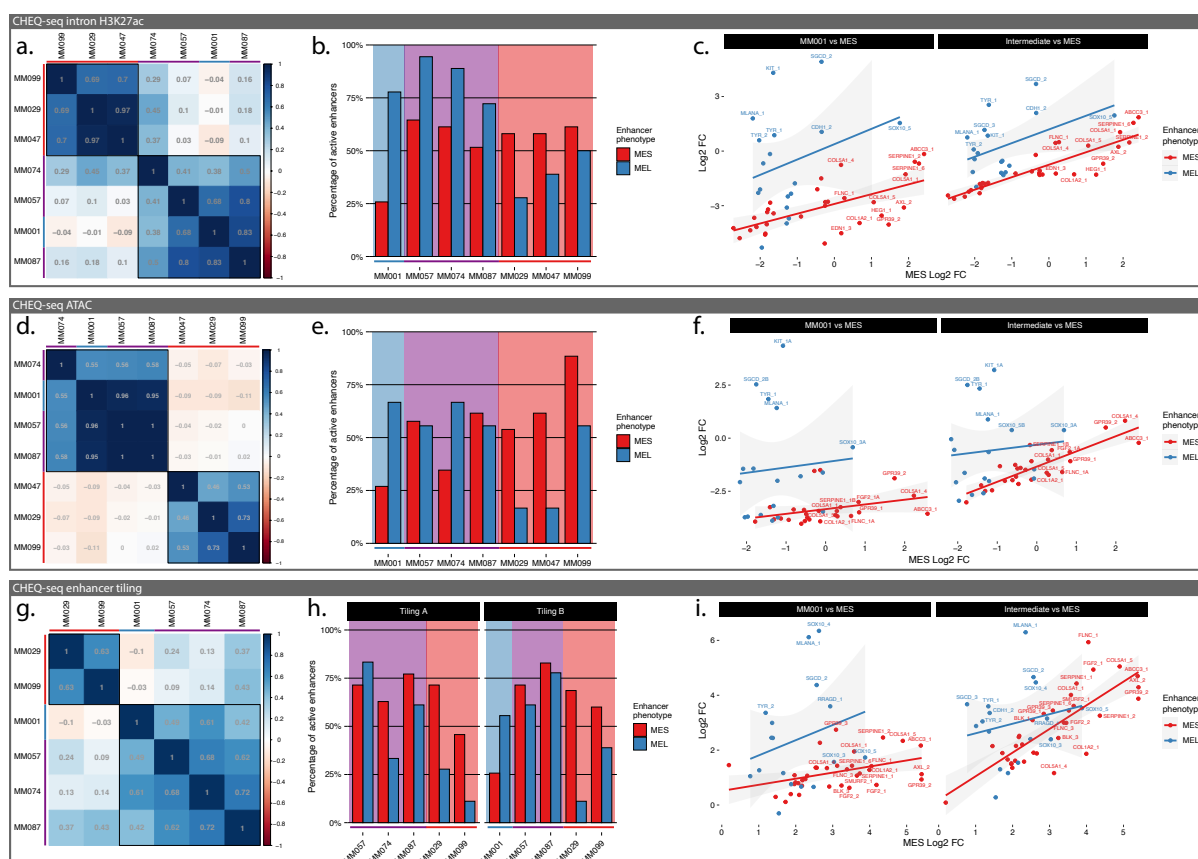

322 **Figure 4: Specificity of MEL and MES enhancers in intermediate lines.** **a., d., g.,** Pearson correlation coefficient  
 323 table across 7 MM lines for CHEQ-seq intron H3K27ac library (**a.**), CHEQ-seq ATAC-seq library (**d.**) and combined  
 324 CHEQ-seq enhancer tiling libraries (**g.**). **b., e., h.,** Percentage of active MEL and MES enhancers for each line (**b.,**  
 325 H3K27ac library; **e.**, ATAC-seq library; **h.**, enhancer tiling libraries). Red, purple and blue bars next to cell line  
 326 names and background indicate MES, Intermediate and MEL lines respectively. **c., f., i.,** Scatter plot of CHEQ-seq  
 327 results for the intron H3K27ac library (**c.**), the ATAC-seq library (**f.**) and the combined CHEQ-seq enhancer tiling  
 328

329 *libraries (i.) activity with merged MES line values versus MM001 (left panel) or merged intermediate MEL lines*  
330 *(right panel).*

331

### 332 **Key transcription factor binding sites explain melanoma enhancer activity**

333 To better understand which TFs are important for MEL enhancer activity, we included tiles  
334 with MITF, SOX and TFAP binding site mutations in our tiling libraries. The comparison of wild  
335 type versus mutated tiles shows that TFAP does not affect the activity of the profiled  
336 enhancers in any of the MEL lines (Supplementary Fig 7). On the other hand, loss of SOX or  
337 MITF often negatively affects enhancer activity. KIT\_1 provides a good example of both MITF  
338 and SOX motif contributions in MM001 (Fig 5a.). The tiling library confirms the location of  
339 enhancer activity to be in the KIT\_1A region, where both motifs are found to influence the  
340 activity. Mutation of the SOX binding site abolishes tile activity. The same is observed when  
341 the MITF binding site is mutated, with the notable exception of one tile also containing the  
342 SOX motif. It is worth noting that despite KIT\_1(A) being by far the most active region in both  
343 the H3K27ac (together with SGCD\_2) and the ATAC-seq library, tiles with a higher activity have  
344 been found in 5 other MEL regions. This suggests that no individual tile recapitulates the  
345 enhancer activity coming from the whole accessible regions. The DeepMEL2 topic 16 and 17  
346 prediction scores closely follow tile activity (FC), both highlighting the SOX and MITF motifs.  
347 Interestingly, the activity is not centred on the ATAC-seq peak summit. This suggests that,  
348 through training with ATAC-seq data, DeepMEL2 has identified TFBSs responsible for both  
349 accessibility *and* activity. Motif enrichment analysis on both the active and most accessible  
350 tiles in MEL lines identifies the E-box motif (MITF) as highly enriched in both active and  
351 accessible sequences while the SOX motif is only enriched in accessible tiles (Fig 4c.). On the  
352 other hand, AP-1 motifs are enriched only in active tiles. The discrepancy between the effect  
353 of some SOX mutations on activity and the absence of enrichment for the SOX motif in active  
354 tiles could be due to the low number of MEL enhancers tested (18).

355

### 356 **SOX10 dependent ATAC-seq peaks with enhancer activity are enriched in MITF motifs**

357 To study MEL enhancers in more detail, we designed a new library. A SOX10 knockdown (KD)  
358 with siRNA was performed on MM057 and MM087, shifting these lines to a MES phenotype,  
359 and was followed by ATAC-seq after 0, 24, 48 or 72 hours (Bravo González-Blas et al., 2019).  
360 After cisTopic analysis, we selected 1,461 ATAC-seq peaks where accessibility is lost upon KD  
361 and tiled them with 190 bp long sequences and 120 bp shifts, resulting in 6,696 individual  
362 sequences (Supplementary Fig 8a.-b.). We cloned this library in the CHEQ-seq vector and  
363 transfected it in MM087. Analysis of tile activity revealed that 15.1% of the selected ATAC-  
364 seq peaks exhibit enhancer function in MM087 (Supplementary Fig 8c.-d.). We performed  
365 Gene Set Enrichment Analysis (GSEA) of ChIP-seq of SOX10 and MITF in 501mel and TFAP2A  
366 in human primary melanocytes on the tiles ranked according to their activity (Fig 5d.). Only  
367 the MITF ChIP-seq signal was enriched in active tiles, indicating that SOX10-dependent  
368 regions containing MITF sites are preferentially active. Those observations were confirmed by

369 differential motif discovery of active versus inactive tiles with the E-box motif (MITF) among  
370 the most strongly enriched motifs (Supplementary Fig 8e.).

371

### 372 **Synthetic SOX - MITF motifs combinations highlight MEL enhancer regulatory grammar**

373 To further investigate a possible interaction between SOX10 and MITF and see if a MEL  
374 enhancer can be generated with only those 2 TFBSs, we designed sequences consisting of  
375 combinations of SOX dimer and MITF motifs spread over a 259 bp background sequence (Fig  
376 5e. top panel). Twenty-four different combinations in 2 background sequences were  
377 generated, cloned in the CHEQ-seq vector and transfected in MM001, MM074 and MM087.  
378 The activity of the enhancer progressively increases with the number of SOX motifs (Fig 5e.  
379 middle panel). The presence of MITF motifs additionally increases enhancer activity but this  
380 differs from the effect of the SOX motifs (Fig 5e. bottom panel). We see a progressive increase  
381 of the activity based on the number of MITF binding sites only when there is also a SOX dimer  
382 motif present in the sequence. In the absence of a SOX motif, enhancer activity remains low  
383 in comparison with sequences containing at least one SOX motif, even though 6 MITF motifs  
384 are present. The presence of multiple SOX motifs greatly increases the enhancer activity,  
385 reducing the influence of MITF motifs (Fig 5e. bottom panel).

386 DeepMEL2 predictions on the synthetic sequences confirm these observations  
387 (Supplementary Fig 9a.-b.). Topic 16 predictions show the same constant increase based on  
388 the number of SOX binding sites in agreement with the measured activity. Topic 17  
389 predictions also increase based on the number of MITF motifs when one SOX motif is present  
390 and are brought down to background level when SOX is absent. These results highlight a cis-  
391 regulatory grammar in MEL enhancers involving SOX10 and MITF. As previously described in  
392 enhancers regulating pluripotency in mouse embryonic stem cells, regardless of TFBSs  
393 positioning, the number of binding sites remains the predominant factor determining activity  
394 (Supplementary Fig 9c.; King et al., 2020).

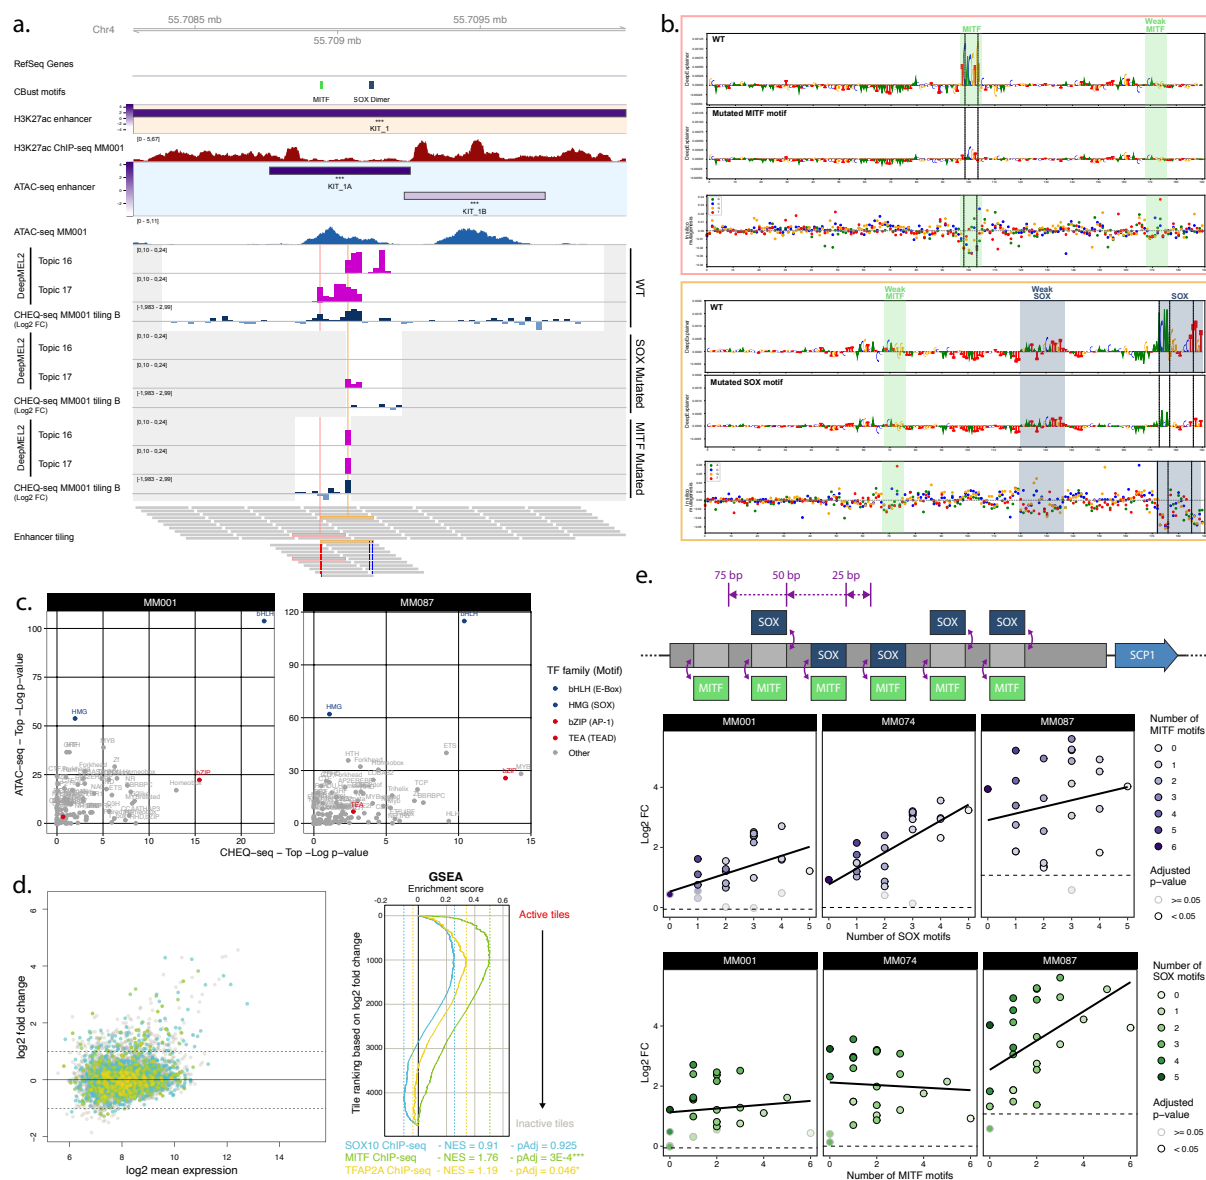

395  
 396 **Figure 5: a.** *KIT\_1* region activity summary in MM001. The 'CBust motifs' track shows identified TFBSs for MITF  
 397 and SOX. DeepMEL2 prediction scores for topic 16 (SOX) and 17 (MITF) and CHEQ-seq activity values are shown  
 398 for the WT, SOX mutated and MITF mutated tiles. Grey areas are regions not covered by the tiling library. The  
 399 'Enhancer tiling' track represents the actual location of the tiles. **b.**, DeepExplainer profiles for the tiles  
 400 highlighted in pink and yellow in the 'Enhancer tiling' track of panel **a.**. Each profile consists of the WT (top panel)  
 401 and mutated (middle panel) tile nucleotide score and *in silico* mutagenesis score for the WT tile (bottom panel).  
 402 Dashed lines indicate the location of mutated nucleotides. **c.**, Comparison of the most enriched motif families as  
 403 identified by HOMER between ATAC-seq (top 1/4 most accessible tiles vs rest) and CHEQ-seq tiling libraries (all  
 404 active tiles vs all inactive tiles) for MM001 and MM087. **d.**, Tiles in the MA plot are coloured based on whether  
 405 or not they overlap with SOX10 (blue), MITF (green) or TFAP2A (yellow) ChIP-seq peaks. GSEA of the enrichment  
 406 of SOX10, MITF and TFAP2A ChIP-seq on the tiles ranked according to their activity (log<sub>2</sub> FC). For each of the  
 407 ChIP-seq peak sets, the negative enrichment score (NES) and Benjamini-Hochberg adjusted p-value (pAdj) are  
 408 shown. **e.**, Top panel: cartoon of SOX and MITF motif combinations in a background sequence. Middle and bottom  
 409 panels: CHEQ-seq activity of synthetic enhancers with background sequence 2 in MM001, MM074 and MM087  
 410 sorted by the number of SOX (middle panel) or MITF (bottom panel) motifs present in the sequence. Dashed line  
 411 indicates the log<sub>2</sub> FC value of the background sequence without any motif.

412

413 **AP-1 sites alone can explain MES enhancer activity**

414 Finally, we looked for the presence of AP-1 and TEAD binding sites in the previously tested  
415 acetylated regions and generated mutated versions of the enhancer tiles. Comparison of wild  
416 type versus TEAD or AP-1 mutant tiles shows a positive effect of AP-1 on activity in all cell  
417 lines (Supplementary Fig 10). On the other hand, TEAD motifs only show a limited effect in  
418 the MM029 tiling B sample and MM087 tiling A sample.

419 The COL5A1\_5 region illustrates the influence of AP-1 (Fig 6a.). Within this region, three  
420 enhancers are found active in all cell lines bar MM001, which shows activity only for the  
421 second enhancer. The enhancer activity of the H3K27ac and ATAC based regions across the  
422 tested MM lines agrees with the tile activity where MM001 has no or low activity and  
423 intermediate and MES lines have a strong activity (Fig 6a.-b.).

424 Focusing on the first active region, enhancer activity is limited to a subset of the tiles  
425 containing an AP-1 motif (Fig 6c.). Importantly, the observed, empirical activity of a tile agrees  
426 with its DeepMEL2 prediction score. The generation of DeepExplainer profiles from those  
427 predictions reveal the presence of a ZEB repressor motif next to the first AP-1 site (Fig 6d.;  
428 Postigo and Dean, 1999). In line with this, enhancer activity is absent from all tiles containing  
429 this motif (Fig 6c.-d.). The comparison of wild type versus AP-1 mutant tiles specifically in that  
430 region further confirms the function of AP-1 as an activator in MEL intermediate and MES  
431 lines (Fig 6c.-e.). Finally, motif enrichment analysis on both the active and most accessible  
432 tiles in MES lines found only AP-1 enriched (Fig 6f.).

433 The gene regulatory network of the MES subtype was previously found to be mainly  
434 controlled by AP-1 and TEAD (Verfaillie et al., 2015). Our MPRA results show that only AP-1  
435 has a direct effect on enhancer activity in the regions tested, and that the cis-regulatory role  
436 of TEAD motifs remain unknown.



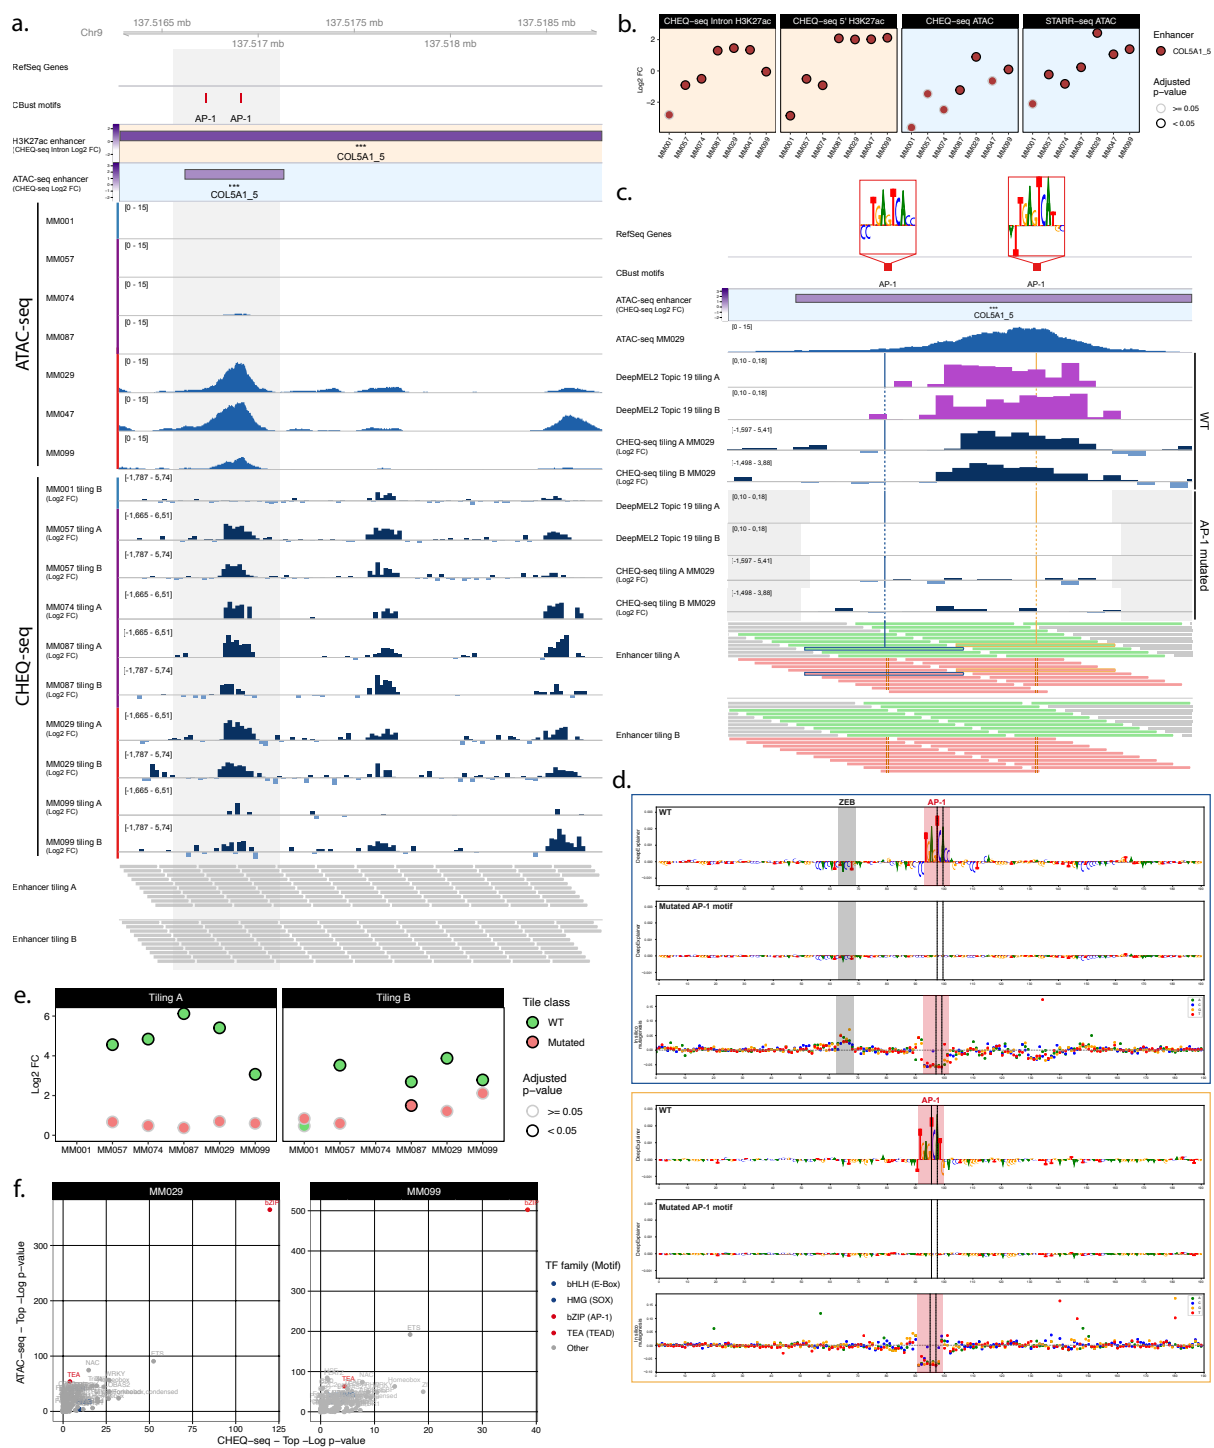

437  
 438 **Figure 6: a.**, ATAC-seq signal and CHEQ-seq WT tiles activity in the COL5A1\_5 H3K27ac library region. 'CBust  
 439 motifs' track shows identified TFBSs for AP-1. Activity of H3K27ac and ATAC-seq regions are from MM029. **b.**,  
 440 Enhancer activity for the H3K27ac ChIP-seq based and ATAC-seq based COL5A1\_5 region. **c.**, CHEQ-seq activity  
 441 of WT tiles and AP-1 binding site mutated tiles in MM029. 'DeepMEL2' tracks correspond to the accessibility  
 442 prediction score for each tile. The displayed region corresponds to the highlighted area in panel **a.** Grey areas in  
 443 'DeepMEL2' and 'CHEQ-seq tiling' tracks correspond to regions not covered by the tiling library. In the 'Enhancer  
 444 tiling' tracks, red and green tiles are the mutated and WT tiles, respectively. **d.**, DeepExplainer profiles for the  
 445 tiles highlighted in blue and yellow in the 'Enhancer tiling A' track of panel **c.** Each profile consists of the WT (top  
 446 panel) and mutated (middle panel) tile nucleotide score and in silico mutagenesis score for the WT tile (bottom  
 447 panel). Dashed lines indicate the location of mutated bases. **e.**, CHEQ-seq signal of the most active tile among  
 448 the mutated and corresponding WT tiles for the COL5A1\_5 region. **f.**, Comparison of the most enriched motif

449 *families as identified by HOMER between ATAC-seq (top ¼ most accessible tiles vs rest) and CHEQ-seq tiling*  
450 *libraries (all active tiles vs all inactive tiles) for MM029 and MM099.*

451

## 452 **Discussion**

453 We have investigated enhancer activity of regions specific to the two main subtypes of  
454 melanoma across a panel of patient-derived malignant melanoma lines. By studying  
455 candidate enhancers with different sequence lengths and by interpreting the results in  
456 conjunction with deep learning predictions, we obtained a better understanding of the  
457 function and specificity of melanoma enhancers.

458 The first studies that used MPRAs were based on very short sequences (84 to 145 nt), and  
459 identified a modular and motif-centric definition of enhancer elements (Kheradpour et al.,  
460 2013; Melnikov et al., 2012; White et al., 2013). The use of captured genomic regions allowed  
461 for longer (hundreds of bp) and more (several millions) sequences to be tested in parallel  
462 (Arnold et al., 2013; Verfaillie et al., 2016; Wang et al., 2018). While providing a genome-wide  
463 view on enhancer activity, the cloned fragments are highly variable in size, and do not allow  
464 for creating mutations. Furthermore, most studies using MPRAs have been limited to one cell  
465 line, or two very different cell lines (e.g., K562 and HepG2; or S2 and OSC in *Drosophila*; Arnold  
466 et al., 2013; Ernst et al., 2016), leaving the evaluation of enhancer specificity unassessed or  
467 reduced to individual examples. Here we repeat the MPRAs in a panel of seven cell lines from  
468 the same disease, allowing us to validate the cell state specificity of the selected regions.

469 Our approach of selecting putative enhancers based on specific H3K27ac ChIP-seq peaks,  
470 located close to differentially expressed genes, resulted in a high success rate (60 to 75%) akin  
471 to other studies leveraging a similar approach (Gorkin et al., 2020; Graybuck et al., 2021). In  
472 contrast, our large-scale library based solely on ATAC-seq peaks that decrease after SOX10 KD  
473 contained only 15.1% of active enhancers (Supplementary Fig 8). This indicates that success  
474 rates of enhancer activity vary widely, and whereas most of the differential H3K27ac peaks  
475 near marker genes are enhancers, many ATAC-seq peaks spread out across the genome, even  
476 when they are affected by TF knock-down, do not act as enhancers when tested in reporter  
477 assays. We also find active enhancers in closed chromatin regions, a phenomenon previously  
478 described in whole genome STARR-seq studies in Human and *Drosophila* (Arnold et al., 2013;  
479 Liu et al., 2017). Those closed regions can often be found accessible in other cell lines of our  
480 panel, and their ectopic activity suggests that the chromatin state in the genome differs from  
481 the episomal plasmid, keeping the enhancer inactive in the genome despite what seems to  
482 be a sufficient TF expression to trigger their activity in our episomal assay.

483 The influence of the size of the candidate enhancer has previously been assessed, although  
484 to a limited extent, and only by choosing sizes that are not representative of chromatin  
485 structures (Klein et al., 2020). Here we tested long sequences corresponding to H3K27ac  
486 regions up to 2.9 kb, 0.5 kb ATAC-seq peak regions located within the larger H3K27ac domain,  
487 and finally short 190 bp sequences tiling acetylated regions. This revealed that the actual  
488 enhancer within a H3K27ac region is usually located within the accessible sub-region of the  
489 H3K27ac region. Furthermore, the activity of that ATAC-seq peak can often be recapitulated

490 by a sequence of 190 bp in length. Previous studies have used enhancer tiling to assess the  
491 activity of accessible chromatin regions and highlighted the importance of cell type-specific  
492 binding sites (Ernst et al., 2016; Wang et al., 2018). Nevertheless, such a short sequence does  
493 not always capture all the regulatory information found within the accessible region. Our  
494 detailed description of KIT\_1A and COL5A1\_5 ATAC-seq peaks highlights the presence of both  
495 activator and repressor elements spread over distances larger than 190 bp that cannot be  
496 jointly evaluated with our tiled MPRA. This finding highlights the necessity of using ~500 bp  
497 long sequences to confidently evaluate the composition of enhancers.

498 Many genes are regulated by an 'array' of enhancers that are thought to cooperate to regulate  
499 target gene expression by forming a chromatin hub (Giammartino et al., 2020; Gorkin et al.,  
500 2014; Zhu et al., 2021). For several gene loci in this study, we selected multiple regions near  
501 the same target gene. This experiment indicated that not all regions with similar acetylation  
502 and ATAC-seq profile harbour enhancer activity in the reporter assay, but that the  
503 identification of relevant TFBSs is indicative to find active enhancers. In that regard, the use  
504 of deep learning models, even when they are trained only on ATAC-seq data, like DeepMEL2  
505 (Atak et al., 2021), can provide a powerful tool to identify key TFs and evaluate enhancer  
506 activity.

507 An intriguing finding in this study is the gradient of MES enhancer activity across our panel of  
508 cell lines, with MM001, intermediate and MES lines having low, medium and high activity  
509 respectively. These enhancer profiles do not agree with their acetylation, ATAC-seq and  
510 transcriptome profiles, which all show a strong homogeneity across MEL and MES subtypes  
511 respectively. This discrepancy was more pronounced with short 190 bp sequences. Our results  
512 suggest that AP-1 is responsible for the activity of MES enhancers, agreeing with its  
513 predominance in allele-specific chromatin accessibility variants in melanoma (Atak et al.,  
514 2021). Note that AP-1 is also typically activated during stress response (Hess et al., 2004). This  
515 may explain the limited activity of MES regions in MM001 following electroporation.  
516 Nevertheless, AP-1 enhancers show much higher activity observed in intermediate lines,  
517 which cannot be explained by a stress response only. The observed activity of AP-1 enhancers  
518 in intermediate lines, even though they are not accessible, nor acetylated in these lines, could  
519 be due to the episomal reporter assay, whereby the (limited) AP-1 activity in these lines can  
520 activate enhancers on a plasmid, but not in the endogenous locus. The use of a genome  
521 integrated reporter assay could help to determine if the accessibility of the sequence is  
522 required for MES enhancer activity in MEL lines.

523 The analysis of MEL regions revealed that both SOX and MITF binding sites independently  
524 contribute to enhancer activity. TFAP2 binding sites did not show any influence on enhancer  
525 activity in the tested H3K27ac regions and showed only a small enrichment (NES: 1.19, pAdj:  
526 0.046) in SOX10 dependent ATAC-seq peaks displaying activity. Those results contradict  
527 previous observations of TFAP2 and MITF co-occurrence in active regulatory elements in  
528 melanocytes and of TFAP2 pioneer function during cell fate commitment in neural crest cells  
529 (Rothstein and Simoes-Costa, 2020; Seberg et al., 2017). These differences may be explained  
530 at least in part by the limited number of regions selected in our H3K27ac library or by a

531 possible reduced influence of TFAP2 in the MM lines used in this study. Interestingly, we  
532 identify an interaction between SOX and MITF where the presence of at least one SOX dimer  
533 motif greatly increases the activity of enhancers containing MITF motifs. It is not clear if this  
534 interaction is due to the direct cooperation of SOX10 and MITF or the known pioneer factor  
535 function of SOX family members (Julian et al., 2017). The cooperation between these two TFs  
536 could be governed by clear rules requiring the presence of a SOX motif for activity or by the  
537 necessity of interactions through heterotypic clusters of TFBSs to maintain a high level of  
538 activity. Indeed, studies have shown that, in some cases, homotypic clusters of TFBSs for a  
539 single TF can drive lower expression than heterotypic clusters of TFBSs for multiple TFs (Fiore  
540 and Cohen, 2016; Levo and Segal, 2014; White et al., 2016). Our synthetic combinations assay  
541 did not include sequences with less than 6 MITF motifs without SOX motifs but we did identify  
542 such type of sequences active in our enhancer tiling assay (e.g. KIT\_1 and SOX10\_4  
543 Supplementary Fig 3b.-c.), suggesting that a SOX motif is not required in enhancers with few  
544 MITF motifs. Alternatively, the pioneer function of SOX would suggest that the sequences  
545 cloned in the reporter vector are subject to, at least partial, chromatinisation. Riu et al.  
546 previously presented evidence supporting plasmid chromatinisation, more precisely of  
547 regions from bacterial origin resulting in silencing of a human expression cassette (Riu et al.,  
548 2007). However, it is still unclear if non-coding human regions could also be subject to  
549 chromatinisation in a plasmid context and what role sequence length might play. We find a  
550 less pronounced influence of the SOX motif in short 190 bp sequences compared to 259 bp  
551 sequences, and shorter MES enhancers also show more ectopic activation in intermediate  
552 lines, which may suggest that short enhancer sequences are being less efficiently  
553 chromatinised. Consequently, short enhancers might be characterised by increased  
554 accessibility in an extrachromosomal reporter, uncoupling measured activities from those  
555 demonstrated at the endogenous locus. Kheradpour et al. proposed a similar hypothesis by  
556 suggesting that DNA sequence features contained within the tested elements are partly  
557 responsible for establishing the endogenous chromatin state (Kheradpour et al., 2013). These  
558 considerations are also relevant in the context of extrachromosomal DNA driving oncogene  
559 overexpression in various human malignancies (Verhaak et al., 2019). The use of integrated  
560 MPRA or the measurement of chromatin accessibility in the plasmid would help to determine  
561 if enhancer sequences are subject to chromatin modification.

562 With this study we show that melanoma subtype specific enhancers can be identified, even  
563 to the size of 190bp, which indicates promising avenues to use such information gathered  
564 from MPRA to identify small and specific enhancers for enhancer therapy. Our assay with  
565 combinations of SOX and MITF motifs showed that new MEL enhancers can be designed by  
566 addition of TFBSs to a random background sequence and that the level of activity can be  
567 controlled by varying the number of TFBSs. Using genomic regions confirmed as MEL  
568 enhancers and adjusting the motif sequences and numbers could further improve enhancer  
569 design.

570  
571

## 572 **Methods**

### 573 **MPRA design and cloning**

#### 574 *H3K27ac based library*

575 The selection of H3K27ac ChIP-seq regions harbouring potential state-specific enhancer  
576 activity was done as follows. Differentially enriched H3K27ac ChIP-seq peaks between MEL  
577 and MES state, identified in our previous study (Verfaillie et al., 2015), were used as input in  
578 i-cisTarget (Imrichová et al., 2015) to identify enriched TFBSs in specifically acetylated regions.  
579 For each melanoma subtype, the target genes of the top 3 enriched TFBSs were extracted and  
580 used to filter the list of differentially expressed genes identified in each subtype (Verfaillie et  
581 al., 2015). From the remaining top differentially expressed genes, ChIP-seq tracks are visually  
582 investigated using the UCSC Genome Browser for regions displaying acetylation peaks only in  
583 one state close to those genes (Regions of ~100 kb upstream and downstream of the genes  
584 were explored). Candidate regions were preferentially selected if they also overlapped with  
585 ChIP-seq peaks for SOX10 or MITF for MEL regions and JUN and JUNB (AP-1) for MES regions.  
586 65 regions with a size < 3 kb were manually selected and primers to amplify them were  
587 designed using Primer3Plus within the flanking first 100 bp on each side of the sequence. 15  
588 bp extensions were added to the primers to allow recombination with the region upstream  
589 of the SCP1 promoter in the CHEQ-seq vector (Verfaillie et al., 2016) via In-Fusion reaction  
590 (Primer list in Supplementary Table 2).

591 All PCR amplifications performed in this study make use of the KAPA HiFi HotStart ReadyMix  
592 (Roche, Basel, Switzerland). The amplification of the selected regions was done from MM074  
593 genomic DNA in a 50 µl reaction. PCR fragments were then purified on a 0.8% agarose gel and  
594 the sequence was confirmed via Sanger sequencing. 53 regions could be successfully  
595 amplified (Supplementary Table 1). For the generation of the CHEQ-seq 5' library, the CHEQ-  
596 seq vector containing a random 17 bp barcode (BC) upstream of the synthetic intron was  
597 linearized by inverse PCR with the primers "CHEQ-seq\_lin\_5'\_For" and "CHEQ-  
598 seq\_lin\_5'\_Rev" resulting in a fragment with both ends overlapping with the primers designed  
599 to amplify the selected regions. Amplified regions were mixed in equimolar ratio and  
600 introduced in the CHEQseq vector via In-Fusion reaction (Takara Bio, Kusatsu, Japan) with a  
601 vector to insert ratio of 1:2.

602 For the generation of the CHEQ-seq Intron library, amplified regions were reamplified with  
603 primers containing adaptors to allow recombination within the intron of the CHEQ-seq vector  
604 ("H3K27Ac\_lib\_intron\_For", "H3K27Ac\_lib\_intron\_Rev"). The CHEQ-seq vector containing a  
605 random 18 bp BC downstream of the synthetic intron was linearized by inverse PCR with the  
606 primers "CHEQ-seq\_lin\_Intron\_For" and "CHEQ-seq\_lin\_Intron\_Rev". Reamplified regions  
607 were mixed in equimolar ratio and introduced in the CHEQseq vector via In-Fusion reaction  
608 with a vector to insert ratio of 1:2. The In-Fusion reactions were dialysed against water in a 6  
609 cm petri-dish with a membrane filter MF-Millipore 0.05 µm (Merck, Kenilworth, New Jersey)  
610 for 1 hour. Reactions are recovered from the membrane and 2.5 µl of the reaction are  
611 transformed into 25 µl of Lucigen Endura ElectroCompetent Cells (Biosearch Technologies,

612 Hoddesdon, United Kingdom). Transformed bacteria are cultured overnight in a shaker before  
613 maxiprep.

#### 614 *ATAC-seq based library*

615 The sequences constituting the ATAC-seq based library are selected from ATAC-seq peaks  
616 from MM001, MM029, MM047, MM057, MM074, MM087 and MM099 overlapping with  
617 H3K27ac library regions. Among this subset, only peaks that overlap with regions identified  
618 as active in the H3K27ac library or that are assigned as MEL- or MES-specific regulatory  
619 regions (respectively represented by regions belonging to topic 4 and topic 7) in our  
620 previously published cisTopic analysis of ATAC-seq data from 16 human melanoma cell lines  
621 were retained (Bravo González-Blas et al., 2019). The final selection included 46 ATAC-seq  
622 peaks (Supplementary Table 1). The summit of each peak was extended by 250 bp on both  
623 sides to generate a 501 bp sequence. At the 3' end of the sequence a 16 bp spacer sequence  
624 was added, followed by an 8 bp BC specific for each selected region. 38 sequences were  
625 synthesised by TWIST Biosciences (South San Francisco, California). This includes 4 sequences  
626 where an A or a T was substituted to break a polyA or polyT respectively in order to make the  
627 sequences compatible with the synthesis process. Primers were designed for the remaining 8  
628 sequences to amplify them from genomic DNA ("ATAC based library amp" in Supplementary  
629 table x). Only one PCR, i.e. for the amplification of the SERPINE1\_2 sequence, was not  
630 successful. The CHEQ-seq vector containing a random 17 bp BC upstream of the synthetic  
631 intron and the STARR-seq ORI vector (addgene #99296; Muerdter et al., 2017) were linearised  
632 via inverse PCR ("ATAC based library cloning" in Supplementary table 2). The individual  
633 sequences were pooled together in equimolar ratio and NEBuilder (New England Biolabs,  
634 Ipswich, Massachusetts), with a vector to insert ratio of 1:2, was used to introduce them in  
635 the vectors. Dialysis and transformation are performed similarly to the H3K27ac library.  
636 Before culture for maxiprep, 1:100,000 of the transformed bacteria is plated on a LB-agar dish  
637 with carbenicillin to estimate the complexity of the cloned library. A volume of bacteria  
638 corresponding to a complexity of 3,500 BCs per enhancer is put in culture for maxiprep.

#### 639 *Enhancer tiling libraries*

640 Using a custom script, tiles were generated by selecting 190 bp from the start (library A) or  
641 position 11 (library B) of the H3K27ac selected regions and by switching every 20 bp in 3'  
642 direction. Tile generation is stopped when the position of the final nucleotide of the tile is  
643 superior to the final nucleotide of the H3K27ac region. To generate mutated tiles, we first  
644 scanned all selected H3K27ac regions with Cluster-Buster (cbust; Frith et al., 2003) and the  
645 following position weight matrices (PWM) separately: transfac\_pro\_\_M08838 (SOX10 dimer);  
646 homer\_\_RTCATGTGAC\_MITF; transfac\_pro\_\_M01859 (TFAP monomer);  
647 tfdimers\_\_MD00038 (TFAP dimer); tfdimers\_\_MD00591 (SOX10-TFAP dimer);  
648 hocomoco\_\_JUN\_f1; homer\_\_NATGASTCABNN\_Fosl2; cisbp\_\_M5907 (TEAD). Using a custom  
649 script, motifs were mutated on their 2 or 4 most important nucleotides for monomers and  
650 dimers respectively. Mutated tiles for each motif were generated separately so that all  
651 occurrences of a single motif are present. Shuffled negative control tiles were generated by  
652 shuffling all wild type and mutated sequences with ushuffle (Jiang et al., 2008). Sequences

653 containing a stretch of the same nucleotide for 6 or more nucleotides were filtered out. The  
654 remaining tiles were scored with cbust using the same PWMs and parameters as before and  
655 800 tiles containing no motifs were selected at random. In total, libraries A and B contained  
656 7412 and 7393 tiles respectively (Supplementary Table 1).

657 Adaptor sequences were added to the tiles: “Adaptor\_LibA\_5’” and “Adaptor\_LibA\_3’” for  
658 library A and “Adaptor\_LibB\_5’” and “Adaptor\_LibB\_3’” for library B. The use of different  
659 adaptors for each library will result in the insertion of the library B 20 bp downstream of the  
660 library A, providing a slightly different surrounding context which combined with a high  
661 number of barcodes per enhancer aim at reducing experimental noise. Final libraries were  
662 synthesised via Agilent’s Oligonucleotide Library Synthesis Technology (Santa Clara,  
663 California).

664 Oligonucleotides libraries were resuspended in endotoxin free TE buffer pH 8 to a final  
665 concentration of 20 nM. For each library, 10 PCR reactions are performed with 2  $\mu$ l of  
666 resuspended libraries for 12 cycles with primers “Lib\_A\_amp\_For” and “Lib\_A\_amp\_Rev” or  
667 “Lib\_B\_amp\_For” and “Lib\_B\_amp\_Rev”. The PCR product was first cleaned up using MinElute  
668 (Qiagen) with 5 PCR reactions per column then pooled together and cleaned up a second time  
669 with 1.6X SPRI beads (Beckman Coulter, Brea, California). The CHEQ-seq vector containing a  
670 random 17 bp BC upstream of the synthetic intron was linearised via inverse PCR with primers  
671 “CHEQseq\_lin\_A\_For” and “CHEQseq\_lin\_A\_Rev” or “CHEQseq\_lin\_B\_For” and  
672 “CHEQseq\_lin\_B\_Rev”. Amplified libraries and the corresponding linearised vector were  
673 combined in an NEBuilder reaction with a vector to insert ratio of 1:3.25. Dialysis,  
674 transformation and maxiprep are performed similarly to the H3K27ac library.

#### 675 *SOX10 knockdown based library*

676 To define a set of SOX10-dependent MEL enhancers, we used public OmniATAC-seq data  
677 during a time series of SOX10 knockdown (0, 24, 48, 72h) on two melanoma cells lines  
678 (MM057 and MM087) (GSE114557; Bravo González-Blas et al., 2019). We generated 50  
679 simulated single cells per condition by randomly sampling 50,000 reads per cell. Candidate  
680 regulator regions were defined by peak calling with MACS2 (v.2.0.10) in each of the bulk  
681 samples and by merging the condition-specific peaks using mergeBed (part of BEDtools,  
682 v.2.23.0), and blacklisted regions were removed using  
683 <https://sites.google.com/site/anshulkundaje/projects/blacklists> (hg19). We ran cisTopic  
684 (v0.2.1; Bravo González-Blas et al., 2019) (parameters:  $\alpha = 50/T$ ,  $\beta = 0.1$ , burn-in  
685 iterations = 500, recording iterations = 1,000) for models with a number of topics between 2  
686 and 25. The best model was selected on the basis of the highest log-likelihood, resulting in 16  
687 topics. We binarized the topics using a probability threshold of 0.99 and continued with topic  
688 11, which contained regions that are accessible in baseline conditions but lose accessibility  
689 following SOX10 knockdown. A total of 1,461 enhancers were chosen to be tested. To increase  
690 the resolution of the library, we tiled the sequences to 190 bp using a 120 bp sliding window  
691 across the enhancers resulting in 6696 tiles. In addition, 100 shuffled negative control  
692 sequences were generated similarly to the tiling libraries (Supplementary Table 1). Vector

693 specific adapters were added to the sequences and the tiles were synthesised via Agilent's  
694 Oligonucleotide Library Synthesis Technology.

695 The library was amplified via PCR using primers "Lib\_A\_amp\_For" and "Lib\_A\_amp\_Rev" and  
696 cloned into the linearized CHEQ-seq plasmid by following the same procedure as for the  
697 enhancer tiling library A. Dialysis, transformation and maxiprep are performed similarly to the  
698 H3K27ac library.

#### 699 *Synthetic combinations of SOX and MITF library*

700 Random 259 bp sequences were generated using SMS2 - Random DNA Sequence tool  
701 (Stothard, 2000). Two sequences, displaying no enrichment in any of the topics defined in our  
702 previously published cisTopic analysis (Bravo González-Blas et al., 2019), were selected as  
703 background sequences. SOX and MITF motifs (ACAAAGACGGCTTTGT and CACGTG  
704 respectively) are inserted in the sequence with a motif in the centre and the other motifs  
705 placed upstream and downstream with a distance of 25, 50 or 75 bp (Fig 5e. top panel). A  
706 complete list of motif combinations can be found in Supplementary table 1. Two hundred  
707 negative control shuffled sequences are generated with ushuffle as described previously. An  
708 11 bp BC specific for each enhancer is placed in 5' position of the sequence. Barcoded  
709 enhancers are finally flanked with the adapters GAGCATGCACCGGTG and  
710 CGCTTCGAGCAGACA in 5' and 3' respectively. The final library was synthesised by Twist  
711 Bioscience as an Oligo Pool. The oligonucleotide library is resuspended according to  
712 manufacturer recommendation and amplified via PCR with the primers  
713 "CHEQ\_comb\_amp\_For" and "CHEQ\_comb\_amp\_Rev". The CHEQ-seq vector with a 17 bp  
714 random BC upstream of the intron is linearised via inverted PCR with the primers  
715 "CHEQ\_comb\_lin\_For" and "CHEQ\_comb\_lin\_Rev". NEBuilder is then used to combine the  
716 library with the linearised vector with a vector to insert ratio of 1:2. Dialysis and  
717 transformation are performed similarly to the H3K27ac library. Before culture for maxiprep,  
718 1:100,000 of the transformed bacteria is plated on a LB-agar dish with carbenicillin to estimate  
719 the complexity of the cloned library. A volume of bacteria corresponding to a complexity of  
720 500 BCs per enhancer is put in culture for maxiprep.

721

#### 722 **Enhancer – Barcode assignment**

##### 723 *CHEQ-seq 5'/Intron for H3K27ac CHIP-seq regions*

724 The part of the plasmid extending from the enhancer till the random BC is amplified via PCR  
725 with primers "PacBio\_5'\_For", "PacBio\_5'\_Rev", "PacBio\_Intron\_For" and  
726 "PacBio\_Intron\_Rev" for CHEQ-seq 5' and CHEQ-seq Intron respectively. Gel extraction is  
727 performed to isolate the PCR product with the correct size range using the NucleoSpin Gel  
728 and PCR Clean-up kit (Macherey-Nagel, Düren, Germany). PacBio sequencing library  
729 preparation for both libraries was done by the Genomics Core Leuven (KU Leuven).  
730 Sequencing was done with a PacBio Sequel for long-read sequencing (Pacific Biosciences,  
731 Menlo Park, California) with both libraries sequenced with one SMRT cell. We obtained  
732 66,407 and 105,590 reads with 3 passes for CHEQ-seq 5' and CHEQ-seq Intron respectively.



733 Enhancer - BC assignment was done with a custom script. Briefly, enhancers and random BCs  
734 were independently extracted from the reads with Cutadapt (Martin, 2011). Enhancer  
735 sequences are mapped with Minimap2 (Li, 2018) and a custom genome containing all the  
736 cloned regions, only MAPQ $\geq$ 4 were retained. Mapped enhancers were linked back to  
737 random BCs of the vector. Following assignment, 46 (86.8%) and 50 (94.3%) sequences could  
738 be identified in the CHEQ-seq 5' and Intron library respectively. The CHEQseq 5' library  
739 displayed an average of 31.9 BCs per enhancer while the Intron library displayed an average  
740 of 604.5 BCs per enhancer.

#### 741 *CHEQ-seq for ATAC-seq regions*

742 A PCR amplification of the enhancer specific BC together with the random BC is done with the  
743 primers "Enh-BC\_ATAC\_Stag=X\_For" and "Enh-BC\_ATAC\_Rev". Illumina sequencing adaptors  
744 are added during a second round of PCR with the primers "i5\_Indexing\_For" and  
745 "i7\_Indexing\_Rev". After sequencing in NovaSeq600 for 50 cycles in read 1 and 49 cycles in  
746 read 2, enhancer BCs and random BCs are extracted from read 1 and read 2 respectively with  
747 Cutadapt before being filtered for quality (Q $>$ 30). Following assignment, 44 (95.7%)  
748 sequences could be identified, with an average of 34,815 BCs per enhancer.

#### 749 *CHEQ-seq for enhancer tiling/SOX10-KD library*

750 Cloned sub-libraries are amplified via PCR with the primers "Enh-BC\_Tiling-A\_Stag=X\_For"  
751 (for sub-library A and SOX10-KD library), "Enh-BC\_Tiling-B\_Stag=X\_For" (for sub-library B) and  
752 "Enh-BC\_Tiling\_Rev". Illumina sequencing adaptors are added during a second round of PCR  
753 with the primers "i5\_Indexing\_For" and "i7\_Indexing\_Rev". After sequencing in NovaSeq600  
754 for 251 cycles in read 1 and 51 cycles in read 2, whole length enhancers and random BCs are  
755 extracted from read 1 and read 2 respectively with Cutadapt before being filtered for quality  
756 (Q $>$ 30). Enhancer reads are mapped and linked to random BCs as previously described for  
757 CHEQ-seq 5'/Intron for H3K27ac ChIP-seq regions. Following assignment, 7,356 (99.2%),  
758 7,344 (99.8%) and 6,773 (99.7%) sequences could be identified in the sub-libraries A and B  
759 and the SOX10-KD library respectively, with an average of 3,096, 3,021 and 8,056 BCs per  
760 enhancer.

#### 761 *CHEQ-seq for SOX-MITF synthetic combinations*

762 This CHEQ-seq library is prepared for sequencing similarly to the CHEQ-seq enhancer tiling A  
763 sub-library. After sequencing in NovaSeq600 for 50 cycles in read 1 and 49 cycles in read 2,  
764 enhancer BCs and random BCs are extracted from read 1 and read 2 respectively with  
765 Cutadapt before being filtered for quality (Q $>$ 30). Following assignment, 249 (99.6%)  
766 sequences could be identified, with an average of 276 BCs per enhancer.

767

#### 768 **Cell culture**

769 All MM lines were cultured in Ham's F10 nutrient mix (ThermoFisher Scientific, Waltham,  
770 Massachusetts) supplemented with 10% fetal bovine serum (ThermoFisher Scientific) and 50  
771  $\mu$ g ml<sup>-1</sup> penicillin/streptomycin (ThermoFisher Scientific). Cell cultures were kept at 37°C,  
772 with 5% CO<sub>2</sub>.

773

## 774 **MPRA assay**

775 The MPRA libraries were electroporated in 4 to 6 million cells each using the Nucleofector 2b  
776 or 4D (Lonza, Basel, Switzerland) with 6  $\mu$ g of plasmid DNA and program T-030 or Y-001 and  
777 DS-132, EH-116 or CM-134 respectively. For the CHEQ-seq 5' and Intron H3K27ac and CHEQ-  
778 seq ATAC libraries, one replicate was performed per cell line except for MM087 where three  
779 replicates were performed. For STARR-seq ATAC and the CHEQ-seq SOX-MITF combinations  
780 library, one replicate was performed per cell line. For the CHEQ-seq enhancer tiling libraries,  
781 two replicates were performed per cell line except for MM087 where four replicates were  
782 performed. For the CHEQ-seq SOX10-KD library, three replicates were performed in MM087.  
783 Medium was changed 24 hours after electroporation. 48 hours post-electroporation, cells  
784 were detached from the plate using trypsin (ThermoFisher Scientific). One fifth of the cells  
785 was used for plasmid DNA extraction (Qiagen, Hilden, Germany). The remaining cells  
786 underwent RNA extraction using the innuPREP RNA Mini Kit 2.0 (Analytik Jena, Jena,  
787 Germany), followed by mRNA isolation using the Dynabeads mRNA purification kit (Ambion,  
788 Austin, Texas) and cDNA synthesis using the GoScript RT kit and oligo dT primer (Promega,  
789 Madison, Wisconsin). For STARR-seq samples, a junction PCR is done for 12 cycles with the  
790 primers "STARR-seq\_Junction\_cDNA\_For" or "STARR-seq\_Junction\_plasmid\_For" and  
791 "STARR-seq\_Junction\_Rev" followed by a PCR to amplify the enhancer for 4 cycles with the  
792 primers "STARR-seq\_enhancer\_Stag=X\_For" and "STARR-seq\_enhancer\_Rev". For CHEQ-seq  
793 samples, a PCR was performed to amplify the random BC from the plasmid DNA or cDNA  
794 samples for 16 cycles with the primers pairs "Cheq-  
795 seq\_barcode\_Intron\_round1\_Stag=0\_For"/"Cheq-seq\_barcode\_Intron\_round1\_Rev" for the  
796 CHEQ-seq Intron H3K27ac library or "Cheq-seq\_barcode\_5'\_round1\_Stag=X\_For"/"Cheq-  
797 seq\_barcode\_5'\_round1\_Rev" for all other libraries. To add Illumina sequencing adaptors, all  
798 samples were finally amplified by PCR for 6 cycles with the primers "i5\_Indexing\_For" and  
799 "i7\_Indexing\_Rev". After confirmation of the fragment size with a Bioanalyzer, samples were  
800 sequenced at the Genomics Core Leuven (KU Leuven).

801

## 802 **MPRA analysis**

### 803 *Read processing and BC identification*

804 Read processing following sequencing is performed with a custom bash script. First, random  
805 BCs are extracted using Cutadapt and filtered for a quality (Q-score) > 30. The number of reads  
806 per uniquely identified BC is counted and the name of the enhancer is assigned to the BC  
807 sequence based on the enhancer - BC assignment list for each library. Unassigned BCs are  
808 filtered out to obtain a final data frame containing the name of the enhancer, the BC sequence  
809 and the number of reads.

### 810 *Estimation of enhancer activity*

811 Enhancer activity from MPRA assay is estimated via a custom R script (RStudio, R version  
812 3.6.0). Enhancers are first filtered based on the number of BCs identified in the sequencing  
813 reads. Thresholds of 5 (for the H3K37ac libraries and enhancer tiling libraries), 10 (for ATAC  
814 libraries) or 20 (for the SOX-MITF combinations library) BCs per enhancer are selected based

815 on the complexity of the library and the sequencing saturation of the enhancer - BC  
816 assignment samples. For the remaining enhancers, BC counts are aggregated per enhancer  
817 and then a count per million (CPM) normalisation is applied. Plasmid (input) and cDNA  
818 (output) samples are merged by keeping only enhancers remaining in both samples after  
819 filtering. Input normalisation is done by dividing CPM normalised cDNA counts by CPM  
820 normalised plasmid counts resulting in a FC value. For libraries with shuffled sequences, a  
821 basal expression normalisation is further applied by dividing the FC value of the enhancer by  
822 the median FC value of the shuffled sequences. The MPRAnalyze method was tried as an  
823 alternative to our method and gave nearly identical results in the case of the H3K27ac CHEQ-  
824 seq Intron library (mean Pearson's correlation on log<sub>2</sub> FC  $r = 0.96$ ; Ashuach et al., 2019). The  
825 high computational demand when the number of BCs is high made it inappropriate for the  
826 analysis of most libraries. For consistency, all assays were analysed with our aggregated BC  
827 method which showed more consistency with low complexity libraries and more scalability  
828 with very complex libraries. In order to distinguish active and inactive enhancers, a Gaussian  
829 fit of the shuffled negative control values is performed with the "robustbase 0.93-6" package  
830 and a p-value and Benjamini-Hochberg adjusted p-value is calculated based on that Gaussian  
831 fit for all enhancers with the "stats 3.6.0" package. An enhancer is considered active if its  
832 adjusted p-value is  $< 0.05$ . For the H3K27ac and ATAC-seq libraries, that did not contain  
833 shuffled sequences, regions containing no active tiles in the enhancer tiling MPRA and  
834 displaying low activity in both H3K27ac and ATAC-seq libraries MPRA are selected as negative  
835 controls and used to fit the Gaussian curve. For the CHEQ-seq SOX10-KD library, DEseq2 (Love  
836 et al., 2014) was used for estimating enhancer activity.

### 837 *Sample exclusion*

838 Despite the high number of identified enhancer - random barcode couples during the  
839 assignment step for the CHEQ-seq enhancer tiling libraries A and B, the complexity of those  
840 libraries was so high that less than 3% of the barcodes could be identified following MPRA  
841 assay. This resulted in a low enhancer coverage or an insufficient number of remaining reads  
842 to identify enhancer activity in many samples. The "OutlierD 1.48.0" R package was used to  
843 identify outliers. Samples which displayed  $< 1\%$  of outliers or had too low coverage ( $< 450$   
844 tiles) were excluded.

845

### 846 **Motif enrichment and GSEA analysis**

847 Differential motif enrichment between the active tiles and the remaining tiles for the  
848 enhancer tiling libraries and the SOX10-KD library was performed via Homer findMotifs (Heinz  
849 et al., 2010). For the enhancer tiling libraries, differential motif enrichment was also  
850 performed between the top 1/4th accessible tiles and the remaining tiles. MITF, SOX10 and  
851 TFAP2A ChIP-seq peaks (Laurette et al., 2015; Seberg et al., 2017) were intersected with the  
852 tiles using BEDtools. A GSEA analysis was performed using the R package "fgsea" (Korotkevich  
853 et al., 2021) by ranking the tiles according to their log<sub>2</sub> FC and providing the overlaps of the  
854 ChIP-seq peaks with the tiles as gene sets.

855

## 856 **Deep learning predictions and nucleotide contribution visualisation**

857 Enhancer sequences for the enhancer tiling and SOX-MITF combinations libraries are scored  
858 with the DeepMEL2+GABPA version of DeepMEL2 as described previously (Atak et al., 2021).  
859 To accommodate for the 500 bp required length of the sequences to be scored by DeepMEL2,  
860 the vector sequence flanking the insertion site of the enhancer is added on both sides of the  
861 sequence. A threshold of 0.1 was defined to distinguish between low and high prediction  
862 score for topics 16, 17 and 19 as it approaches the mean score + 2 \* standard deviation of  
863 those topics.

864 Visualisation of nucleotide contribution to DeepMEL2 prediction score is done with  
865 DeepExplainer as described previously (Atak et al., 2021; Lundberg and Lee, 2017).

866

## 867 **ChIP-seq, ATAC-seq and RNA-seq public data**

868 MITF and SOX10 ChIP-seq in 501mel were downloaded from the GEO entry GSE61965  
869 (Laurette et al., 2015). TFAP2A ChIP-seq in human primary melanocytes purified from  
870 discarded neonatal foreskin samples was downloaded from the GEO entry GSE67555 (Seberg  
871 et al., 2017). JUN and JUNB ChIP-seq in MM099 line were downloaded from the GEO entry  
872 GSE159965 (Atak et al., 2021). H3K27ac ChIP-seq for MM001, MM011, MM031, MM034,  
873 MM047, MM057, MM074, MM087, MM099, MM118, SKMEL5 were downloaded from the  
874 GEO entries GSE60666 and GSE114557 (Bravo González-Blas et al., 2019; Verfaillie et al.,  
875 2015). OmniATAC-seq data for MM001, MM011, MM029, MM031, MM034, MM047,  
876 MM057, MM074, MM087, MM099 and MM118 were downloaded from the GEO entries  
877 GSE142238 and GSE134432 (Minnoye et al., 2020; Wouters et al., 2020). SOX10-KD time  
878 course OmniATAC-seq for MM057 and MM087 were downloaded from the GEO entry  
879 GSE114557 (Bravo González-Blas et al., 2019). Single cell RNA-seq data for MM001, MM029,  
880 MM047, MM057, MM074, MM087 and MM099 were downloaded from the GEO entry  
881 GSE134432 (Wouters et al., 2020).

882

## 883 **Data access**

884 MPRA data generated for this study have been submitted to the NCBI Gene Expression  
885 Omnibus (GEO, <https://www.ncbi.nlm.nih.gov/geo/>) under accession number GSE180879.

886

## 887 **Acknowledgements**

888 This work was supported by an ERC Consolidator Grant to S.A. (no. 724226\_cis-CONTROL), by  
889 the KU Leuven (grant no. C14/18/092 to S.A.), by the Foundation Against Cancer (grant no,  
890 2016-070 to S.A.), a PhD and a postdoctoral fellowship from the FWO (L.M., no. 1S03317N,  
891 J.D. no. 12J6916N, respectively) and a postdoctoral research fellowship from Kom op tegen  
892 Kanker (Stand up to Cancer), the Flemish Cancer Society, and from Stichting tegen Kanker  
893 (Foundation against Cancer), the Belgian Cancer Society (J.W.). Computing was performed at  
894 the Vlaams Supercomputer Center and high-throughput sequencing via the Genomics Core  
895 Leuven. MM lines were a kind gift from Pr. Ghanem-Elias Ghanem (Institut Jules Bordet, ULB,

896 Belgium). The funders had no role in study design, data collection and analysis, decision to  
897 publish or preparation of the manuscript.

898

## 899 References

- 900 Arnold CD, Gerlach D, Stelzer C, Boryń ŁM, Rath M, Stark A. 2013. Genome-Wide  
901 Quantitative Enhancer Activity Maps Identified by STARR-seq. *Science* **339**:1074–  
902 1077. doi:10.1126/science.1232542
- 903 Ashuach T, Fischer DS, Kreimer A, Ahituv N, Theis FJ, Yosef N. 2019. MPRAnalyze:  
904 statistical framework for massively parallel reporter assays. *Genome Biol* **20**:183.  
905 doi:10.1186/s13059-019-1787-z
- 906 Atak ZK, Taskiran II, Demeulemeester J, Flerin C, Mauduit D, Minnoye L, Hulselmans G,  
907 Christiaens V, Ghanem GE, Wouters J, Aerts S. 2021. Interpretation of allele-specific  
908 chromatin accessibility using cell state-aware deep learning. *Genome Res*  
909 gr.260851.120. doi:10.1101/gr.260851.120
- 910 Bravo González-Blas C, Minnoye L, Papasokrati D, Aibar S, Hulselmans G, Christiaens V,  
911 Davie K, Wouters J, Aerts S. 2019. cisTopic: cis-regulatory topic modeling on single-  
912 cell ATAC-seq data. *Nat Methods* **16**:397–400. doi:10.1038/s41592-019-0367-1
- 913 Creighton MP, Cheng AW, Welstead GG, Kooistra T, Carey BW, Steine EJ, Hanna J,  
914 Lodato MA, Frampton GM, Sharp PA, Boyer LA, Young RA, Jaenisch R. 2010.  
915 Histone H3K27ac separates active from poised enhancers and predicts  
916 developmental state. *Proc Natl Acad Sci* **107**:21931–21936.
- 917 Ernst J, Melnikov A, Zhang X, Wang L, Rogov P, Mikkelsen TS, Kellis M. 2016. Genome-  
918 scale high-resolution mapping of activating and repressive nucleotides in regulatory  
919 regions. *Nat Biotechnol* **34**:1180–1190. doi:10.1038/nbt.3678
- 920 Fiore C, Cohen BA. 2016. Interactions between pluripotency factors specify cis-regulation in  
921 embryonic stem cells. *Genome Res* **26**:778–786. doi:10.1101/gr.200733.115
- 922 Fox S, Myers JA, Davidson C, Getman M, Kingsley PD, Frankiewicz N, Bulger M. 2020.  
923 Hyperacetylated chromatin domains mark cell type-specific genes and suggest  
924 distinct modes of enhancer function. *Nat Commun* **11**:4544. doi:10.1038/s41467-020-  
925 18303-0
- 926 Frith MC, Li MC, Weng Z. 2003. Cluster-Buster: finding dense clusters of motifs in DNA  
927 sequences. *Nucleic Acids Res* **31**:3666–3668.
- 928 Fu S, Wang Q, Moore JE, Purcaro MJ, Pratt HE, Fan K, Gu C, Jiang C, Zhu R, Kundaje A,  
929 Lu A, Weng Z. 2018. Differential analysis of chromatin accessibility and histone  
930 modifications for predicting mouse developmental enhancers. *Nucleic Acids Res*  
931 **46**:11184–11201. doi:10.1093/nar/gky753
- 932 Gasperini M, Tome JM, Shendure J. 2020. Towards a comprehensive catalogue of validated  
933 and target-linked human enhancers. *Nat Rev Genet* **21**:292–310.  
934 doi:10.1038/s41576-019-0209-0
- 935 Giammartino DCD, Polyzos A, Apostolou E. 2020. Transcription factors: building hubs in the  
936 3D space. *Cell Cycle* **19**:2395–2410. doi:10.1080/15384101.2020.1805238
- 937 Gorkin DU, Barozzi I, Zhao Y, Zhang Y, Huang H, Lee AY, Li B, Chiou J, Wildberg A, Ding  
938 B, Zhang B, Wang M, Strattan JS, Davidson JM, Qiu Y, Afzal V, Akiyama JA, Plajzer-  
939 Frick I, Novak CS, Kato M, Garvin TH, Pham QT, Harrington AN, Mannion BJ, Lee  
940 EA, Fukuda-Yuzawa Y, He Y, Preissl S, Chee S, Han JY, Williams BA, Trout D,  
941 Amrhein H, Yang H, Cherry JM, Wang W, Gaulton K, Ecker JR, Shen Y, Dickel DE,  
942 Visel A, Pennacchio LA, Ren B. 2020. An atlas of dynamic chromatin landscapes in  
943 mouse fetal development. *Nature* **583**:744–751. doi:10.1038/s41586-020-2093-3
- 944 Gorkin DU, Leung D, Ren B. 2014. The 3D Genome in Transcriptional Regulation and  
945 Pluripotency. *Cell Stem Cell* **14**:762–775. doi:10.1016/j.stem.2014.05.017
- 946 Gray LT, Yao Z, Nguyen TN, Kim TK, Zeng H, Tasic B. 2017. Layer-specific chromatin  
947 accessibility landscapes reveal regulatory networks in adult mouse visual cortex.  
948 *eLife* **6**:e21883. doi:10.7554/eLife.21883

- 949 Graybuck LT, Daigle TL, Sedeño-Cortés AE, Walker M, Kalmbach B, Lenz GH, Morin E,  
950 Nguyen TN, Garren E, Bendrick JL, Kim TK, Zhou T, Mortrud M, Yao S, Siverts LA,  
951 Larsen R, Gore BB, Szelenyi ER, Trader C, Balaram P, van Velthoven CTJ, Chiang  
952 M, Mich JK, Dee N, Goldy J, Cetin AH, Smith K, Way SW, Esposito L, Yao Z,  
953 Gradinaru V, Sunkin SM, Lein E, Levi BP, Ting JT, Zeng H, Tasic B. 2021. Enhancer  
954 viruses for combinatorial cell-subclass-specific labeling. *Neuron* **109**:1449-1464.e13.  
955 doi:10.1016/j.neuron.2021.03.011
- 956 Grzywa TM, Paskal W, Włodarski PK. 2017. Intratumor and Intertumor Heterogeneity in  
957 Melanoma. *Transl Oncol* **10**:956–975. doi:10.1016/j.tranon.2017.09.007
- 958 Heinz S, Benner C, Spann N, Bertolino E, Lin YC, Laslo P, Cheng JX, Murre C, Singh H,  
959 Glass CK. 2010. Simple Combinations of Lineage-Determining Transcription Factors  
960 Prime cis-Regulatory Elements Required for Macrophage and B Cell Identities. *Mol*  
961 *Cell* **38**:576–589. doi:10.1016/j.molcel.2010.05.004
- 962 Hess J, Angel P, Schorpp-Kistner M. 2004. AP-1 subunits: quarrel and harmony among  
963 siblings. *J Cell Sci* **117**:5965–5973. doi:10.1242/jcs.01589
- 964 Hoek KS, Eichhoff OM, Schlegel NC, Döbbeling U, Kobert N, Schaerer L, Hemmi S,  
965 Dummer R. 2008. In vivo Switching of Human Melanoma Cells between Proliferative  
966 and Invasive States. *Cancer Res* **68**:650–656.
- 967 Hoek KS, Schlegel NC, Brafford P, Sucker A, Ugurel S, Kumar R, Weber BL, Nathanson KL,  
968 Phillips DJ, Herlyn M, Schadendorf D, Dummer R. 2006. Metastatic potential of  
969 melanomas defined by specific gene expression profiles with no BRAF signature.  
970 *Pigment Cell Res* **19**:290–302. doi:10.1111/j.1600-0749.2006.00322.x
- 971 Imrichová H, Hulselmans G, Kalender Atak Z, Potier D, Aerts S. 2015. i-cisTarget 2015  
972 update: generalized cis-regulatory enrichment analysis in human, mouse and fly.  
973 *Nucleic Acids Res* **43**:W57–W64. doi:10.1093/nar/gkv395
- 974 Inoue F, Ahituv N. 2015. Decoding enhancers using massively parallel reporter assays.  
975 *Genomics* **106**:159–164. doi:10.1016/j.ygeno.2015.06.005
- 976 Jiang M, Anderson J, Gillespie J, Mayne M. 2008. uShuffle: A useful tool for shuffling  
977 biological sequences while preserving the k-let counts. *BMC Bioinformatics* **9**:192.  
978 doi:10.1186/1471-2105-9-192
- 979 Julian LM, McDonald AC, Stanford WL. 2017. Direct reprogramming with SOX factors:  
980 masters of cell fate. *Curr Opin Genet Dev, Cell reprogramming* **46**:24–36.  
981 doi:10.1016/j.gde.2017.06.005
- 982 Kheradpour P, Ernst J, Melnikov A, Rogov P, Wang L, Zhang X, Alston J, Mikkelsen TS,  
983 Kellis M. 2013. Systematic dissection of regulatory motifs in 2000 predicted human  
984 enhancers using a massively parallel reporter assay. *Genome Res* **23**:800–811.  
985 doi:10.1101/gr.144899.112
- 986 King DM, Hong CKY, Shepherdson JL, Granas DM, Maricque BB, Cohen BA. 2020.  
987 Synthetic and genomic regulatory elements reveal aspects of cis-regulatory grammar  
988 in mouse embryonic stem cells. *eLife* **9**:e41279. doi:10.7554/eLife.41279
- 989 Klein JC, Agarwal V, Inoue F, Keith A, Martin B, Kircher M, Ahituv N, Shendure J. 2020. A  
990 systematic evaluation of the design and context dependencies of massively parallel  
991 reporter assays. *Nat Methods* **17**:1083–1091. doi:10.1038/s41592-020-0965-y
- 992 Korotkevich G, Sukhov V, Budin N, Shpak B, Artyomov MN, Sergushichev A. 2021. Fast  
993 gene set enrichment analysis. *bioRxiv* 060012. doi:10.1101/060012
- 994 Laurette P, Strub T, Koludrovic D, Keime C, Le Gras S, Seberg H, Van Otterloo E, Imrichova  
995 H, Siddaway R, Aerts S, Cornell RA, Mengus G, Davidson I. 2015. Transcription  
996 factor MITF and remodeler BRG1 define chromatin organisation at regulatory  
997 elements in melanoma cells. *eLife* **2015**:1–40. doi:10.7554/eLife.06857
- 998 Levo M, Segal E. 2014. In pursuit of design principles of regulatory sequences. *Nat Rev*  
999 *Genet* **15**:453–468. doi:10.1038/nrg3684
- 1000 Li H. 2018. Minimap2: pairwise alignment for nucleotide sequences. *Bioinformatics* **34**:3094–  
1001 3100. doi:10.1093/bioinformatics/bty191
- 1002 Li L, Wunderlich Z. 2017. An Enhancer's Length and Composition Are Shaped by Its  
1003 Regulatory Task. *Front Genet* **8**. doi:10.3389/fgene.2017.00063

- 1004 Liu Y, Yu S, Dhiman VK, Brunetti T, Eckart H, White KP. 2017. Functional assessment of  
1005 human enhancer activities using whole-genome STARR-sequencing. *Genome Biol*  
1006 **18**:219. doi:10.1186/s13059-017-1345-5
- 1007 Love MI, Huber W, Anders S. 2014. Moderated estimation of fold change and dispersion for  
1008 RNA-seq data with DESeq2. *Genome Biol* **15**:550. doi:10.1186/s13059-014-0550-8
- 1009 Lundberg SM, Lee S-I. 2017. A unified approach to interpreting model  
1010 predictions Proceedings of the 31st International Conference on Neural Information  
1011 Processing Systems, NIPS'17. Red Hook, NY, USA: Curran Associates Inc. pp.  
1012 4768–4777.
- 1013 Martin M. 2011. Cutadapt removes adapter sequences from high-throughput sequencing  
1014 reads. *EMBnet.journal* **17**:10–12. doi:10.14806/ej.17.1.200
- 1015 Melnikov A, Murugan A, Zhang X, Tesileanu T, Wang L, Rogov P, Feizi S, Gnirke A, Jr  
1016 CGC, Kinney JB, Kellis M, Lander ES, Mikkelsen TS. 2012. Systematic dissection  
1017 and optimization of inducible enhancers in human cells using a massively parallel  
1018 reporter assay. *Nat Biotechnol* **30**:271–277. doi:10.1038/nbt.2137
- 1019 Minnoye L, Marinov GK, Krausgruber T, Pan L, Marand AP, Secchia S, Greenleaf WJ,  
1020 Furlong EEM, Zhao K, Schmitz RJ, Bock C, Aerts S. 2021. Chromatin accessibility  
1021 profiling methods. *Nat Rev Methods Primer* **1**:1–24. doi:10.1038/s43586-020-00008-  
1022 9
- 1023 Minnoye L, Taskiran II, Mauduit D, Fazio M, Aerschot LV, Hulselmans G, Christiaens V,  
1024 Makhzami S, Seltenhammer M, Karras P, Primot A, Cadieu E, Rooijen E van, Marine  
1025 J-C, Egidy G, Ghanem G-E, Zon L, Wouters J, Aerts S. 2020. Cross-species analysis  
1026 of enhancer logic using deep learning. *Genome Res* **30**:1815–1834.  
1027 doi:10.1101/gr.260844.120
- 1028 Muerdter F, Boryn ŁM, Woodfin AR, Neumayr C, Rath M, Zabidi MA, Pagani M, Haberle V,  
1029 Kazmar T, Catarino RR, Schernhuber K, Arnold CD, Stark A. 2017. Resolving  
1030 systematic errors in widely used enhancer activity assays in human cells. *Nat*  
1031 *Methods*. doi:10.1038/nmeth.4534
- 1032 Postigo AA, Dean DC. 1999. ZEB represses transcription through interaction with the  
1033 corepressor CtBP. *Proc Natl Acad Sci* **96**:6683–6688.
- 1034 Rada-Iglesias A, Bajpai R, Swigut T, Brugmann SA, Flynn RA, Wysocka J. 2011. A unique  
1035 chromatin signature uncovers early developmental enhancers in humans. *Nature*  
1036 **470**:279–283. doi:10.1038/nature09692
- 1037 Rambow F, Rogiers A, Marin-Bejar O, Aibar S, Femel J, Dewaele M, Karras P, Brown D,  
1038 Chang YH, Debiec-Rychter M, Adriaens C, Radaelli E, Wolter P, Bechter O, Dummer  
1039 R, Levesque M, Piris A, Frederick DT, Boland G, Flaherty KT, van den Oord J, Voet  
1040 T, Aerts S, Lund AW, Marine J-C. 2018. Toward Minimal Residual Disease-Directed  
1041 Therapy in Melanoma. *Cell* **174**:843-855.e19. doi:10.1016/j.cell.2018.06.025
- 1042 Riu E, Chen Z-Y, Xu H, He C-Y, Kay MA. 2007. Histone Modifications are Associated with  
1043 the Persistence or Silencing of Vector-mediated Transgene Expression In Vivo. *Mol*  
1044 *Ther* **15**:1348–1355. doi:10.1038/sj.mt.6300177
- 1045 Rothstein M, Simoes-Costa M. 2020. Heterodimerization of TFAP2 pioneer factors drives  
1046 epigenomic remodeling during neural crest specification. *Genome Res* **30**:35–48.  
1047 doi:10.1101/gr.249680.119
- 1048 Seberg HE, Otterloo EV, Loftus SK, Liu H, Bonde G, Sompallae R, Gildea DE, Santana JF,  
1049 Manak JR, Pavan WJ, Williams T, Cornell RA. 2017. TFAP2 paralogs regulate  
1050 melanocyte differentiation in parallel with MITF. *PLOS Genet* **13**:e1006636.  
1051 doi:10.1371/journal.pgen.1006636
- 1052 Stothard P. 2000. The Sequence Manipulation Suite: JavaScript Programs for Analyzing and  
1053 Formatting Protein and DNA Sequences. *BioTechniques* **28**:1102–1104.  
1054 doi:10.2144/00286ir01
- 1055 Tsoi J, Robert L, Paraiso K, Galvan C, Sheu KM, Lay J, Wong DJL, Atefi M, Shirazi R, Wang  
1056 X, Braas D, Grasso CS, Palaskas N, Ribas A, Graeber TG. 2018. Multi-stage  
1057 Differentiation Defines Melanoma Subtypes with Differential Vulnerability to Drug-  
1058 Induced Iron-Dependent Oxidative Stress. *Cancer Cell* **0**.

- 1059 doi:10.1016/j.ccell.2018.03.017  
1060 Verfaillie A, Imrichova H, Atak ZK, Dewaele M, Rambow F, Hulselmans G, Christiaens V,  
1061 Svetlichnyy D, Luciani F, Mooter LV den, Claerhout S, Fiers M, Journe F, Ghanem  
1062 G-E, Herrmann C, Halder G, Marine J-C, Aerts S. 2015. Decoding the regulatory  
1063 landscape of melanoma reveals TEADS as regulators of the invasive cell state. *Nat*  
1064 *Commun* **6**:6683. doi:10.1038/ncomms7683  
1065 Verfaillie A, Svetlichnyy D, Imrichova H, Davie K, Fiers M, Atak ZK, Hulselmans G,  
1066 Christiaens V, Aerts S. 2016. Multiplex enhancer-reporter assays uncover  
1067 unsophisticated TP53 enhancer logic. *Genome Res* **26**:882–895.  
1068 doi:10.1101/gr.204149.116  
1069 Verhaak RGW, Bafna V, Mischel PS. 2019. Extrachromosomal oncogene amplification in  
1070 tumour pathogenesis and evolution. *Nat Rev Cancer* **19**:283–288.  
1071 doi:10.1038/s41568-019-0128-6  
1072 Wang X, He L, Goggin SM, Saadat A, Wang L, Sinnott-Armstrong N, Clausnitzer M, Kellis  
1073 M. 2018. High-resolution genome-wide functional dissection of transcriptional  
1074 regulatory regions and nucleotides in human. *Nat Commun* **9**:5380.  
1075 doi:10.1038/s41467-018-07746-1  
1076 White MA, Kwasnieski JC, Myers CA, Shen SQ, Corbo JC, Cohen BA. 2016. A Simple  
1077 Grammar Defines Activating and Repressing cis-Regulatory Elements in  
1078 Photoreceptors. *Cell Rep* **17**:1247–1254. doi:10.1016/j.celrep.2016.09.066  
1079 White MA, Myers CA, Corbo JC, Cohen BA. 2013. Massively parallel in vivo enhancer assay  
1080 reveals that highly local features determine the cis-regulatory function of ChIP-seq  
1081 peaks. *Proc Natl Acad Sci* **110**:11952–11957. doi:10.1073/pnas.1307449110  
1082 Wouters J, Kalender-Atak Z, Minnoye L, Spanier KI, De Waegeneer M, Bravo González-Blas  
1083 C, Mauduit D, Davie K, Hulselmans G, Najem A, Dewaele M, Pedri D, Rambow F,  
1084 Makhzami S, Christiaens V, Ceysens F, Ghanem G, Marine J-C, Poovathingal S,  
1085 Aerts S. 2020. Robust gene expression programs underlie recurrent cell states and  
1086 phenotype switching in melanoma. *Nat Cell Biol* **22**:986–998. doi:10.1038/s41556-  
1087 020-0547-3  
1088 Yáñez-Cuna JO, Dinh HQ, Kvon EZ, Shlyueva D, Stark A. 2012. Uncovering cis-regulatory  
1089 sequence requirements for context-specific transcription factor binding. *Genome Res*  
1090 **22**:2018–2030. doi:10.1101/gr.132811.111  
1091 Zhu I, Song W, Ovcharenko I, Landsman D. 2021. A model of active transcription hubs that  
1092 unifies the roles of active promoters and enhancers. *Nucleic Acids Res* **49**:4493–  
1093 4505. doi:10.1093/nar/gkab235  
1094  
1095



## 1096 Supplementary figures

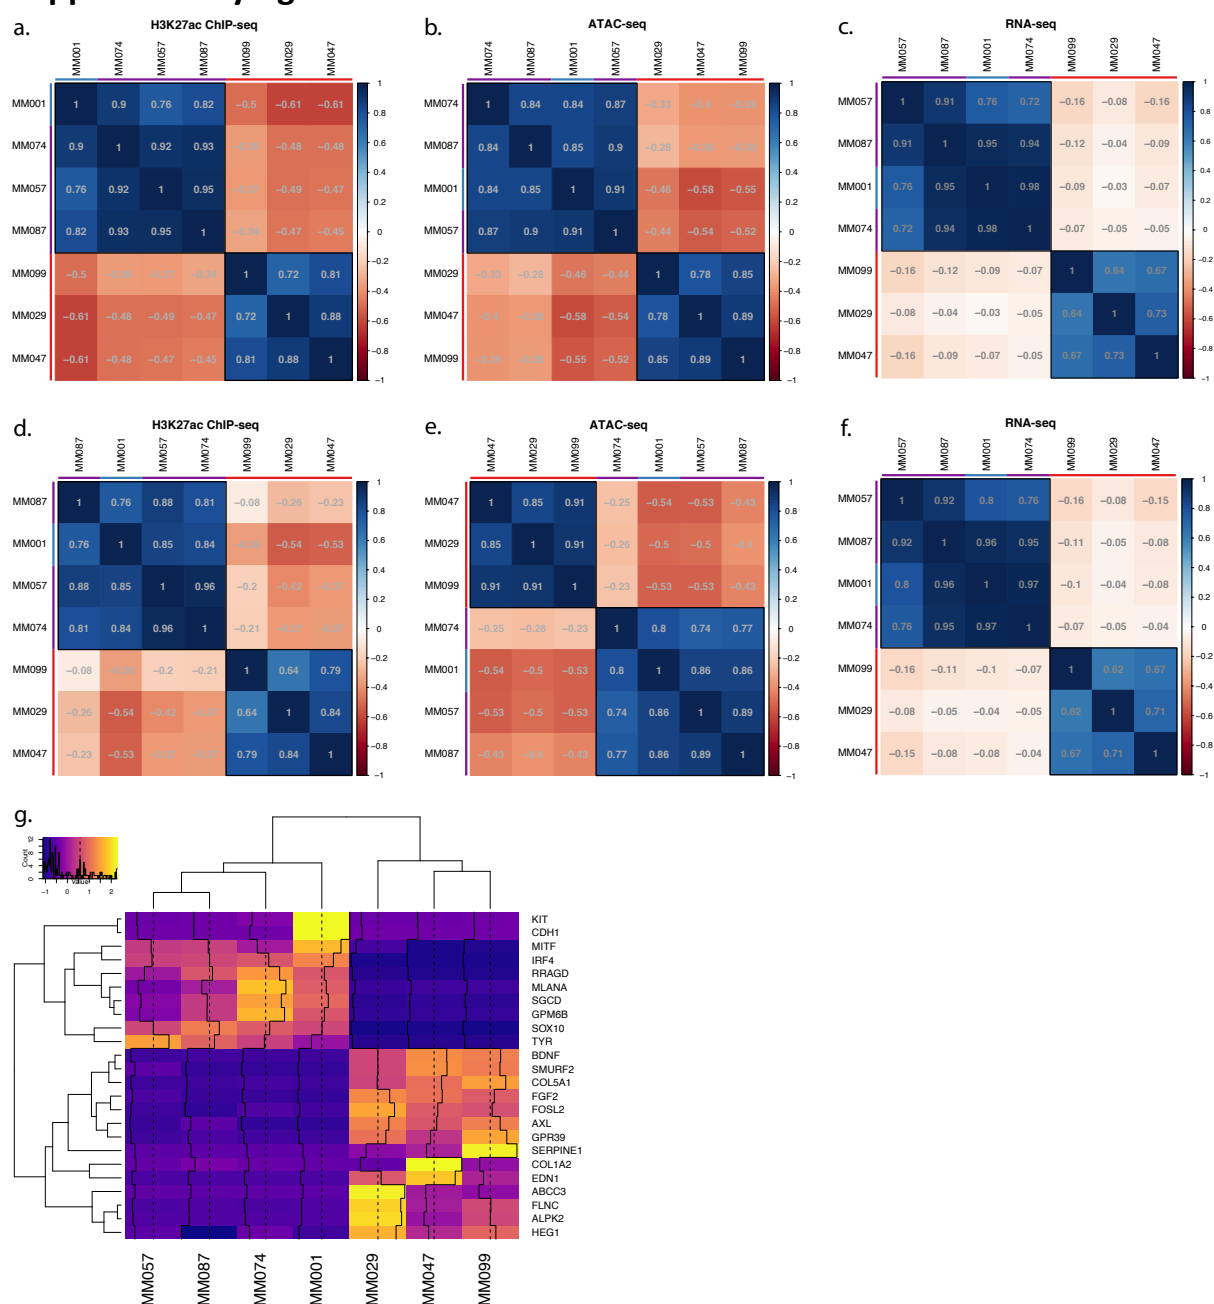

1097  
1098  
1099  
1100  
1101  
1102  
1103

**Supplementary figure 1: a-c.**, Correlation tables displaying the Pearson correlation coefficient for H3K27ac ChIP-seq mean signal of the H3K27ac library regions (**a.**), ATAC-seq mean signal of the same regions (**b.**) and gene expression of the predicted region's target genes from single-cell RNA-seq (**c.**). **d-f.**, Same correlation tables as **a-c.** but for the ATAC-seq based library regions. Red, purple and blue bars indicate MES, Intermediate and MEL lines respectively. **g.**, Mean transcript expression from single-cell RNA-seq data of each gene associated with an enhancer.

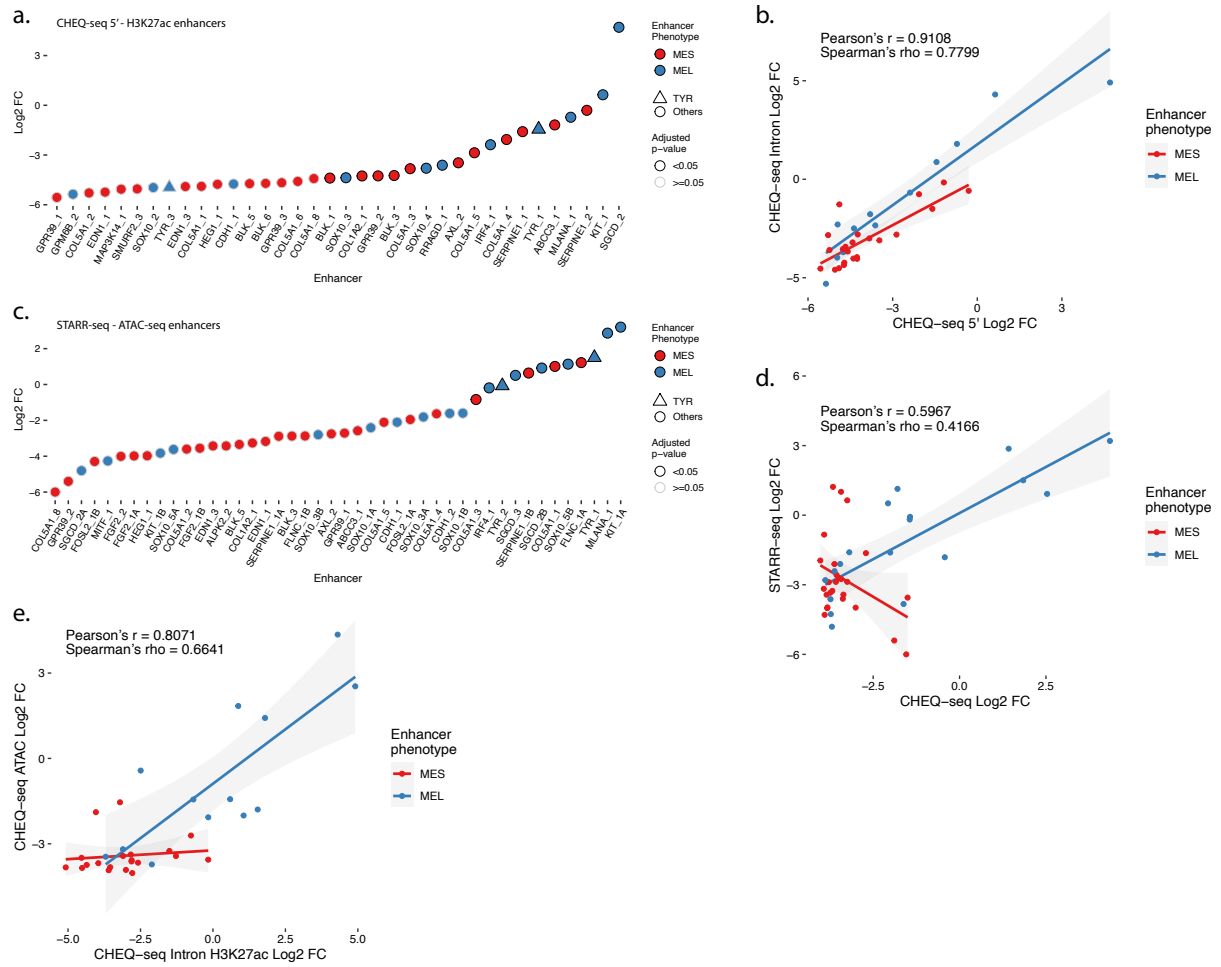

1104 **Supplementary figure 2: a.**, Enhancer activity profile for the CHEQ-seq intron H3K27ac library in MM001. **b.**,  
 1105 Scatterplot representation of CHEQ-seq intron vs CHEQ-seq 5' H3K27ac library in MM001. **c.**, Enhancer activity  
 1106 profile for the STARR-seq ATAC-seq library in MM001. **d.**, Scatterplot representation of CHEQ-seq vs STARR-seq  
 1107 ATAC-seq library in MM001. **e.**, Scatterplot representation of CHEQ-seq intron H3K27ac library vs CHEQ-seq  
 1108 ATAC-seq library in MM001. For H3K27ac regions with 2 ATAC-seq peaks, the highest value was assigned to the  
 1109 region.  
 1110

1111  
 1112  
 1113  
 1114

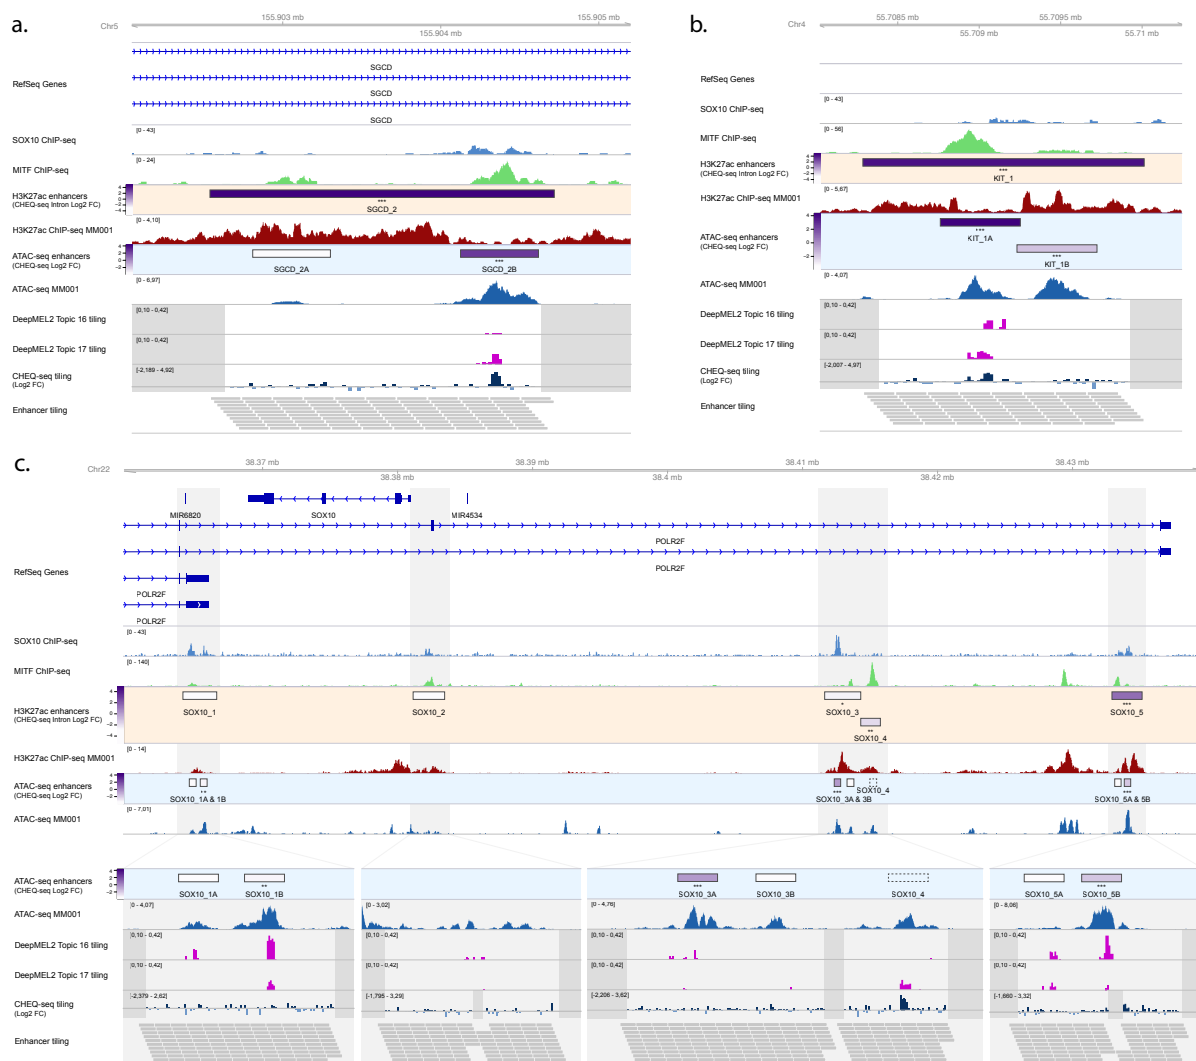

1115  
 1116 **Supplementary figure 3: a., b.,** Enhancer activity of SGCD\_2 (a.), KIT\_1 (b.) and SOX10 (c.) regions. SOX10 and  
 1117 MITF ChIP-seq, H3K27ac ChIP-seq and ATAC-seq for MM001 and DeepMEL2 predictions and CHEQ-seq values of  
 1118 the enhancer tiling are displayed. Dark grey areas are regions not covered by the tiling library. CHEQ-seq activity  
 1119 is visible in the H3K27ac enhancers and ATAC-seq enhancers tracks. Benjamini–Hochberg adjusted p-values: \* <  
 1120 0.05; \*\* < 0.005; \*\*\* < 0.001.  
 1121  
 1122

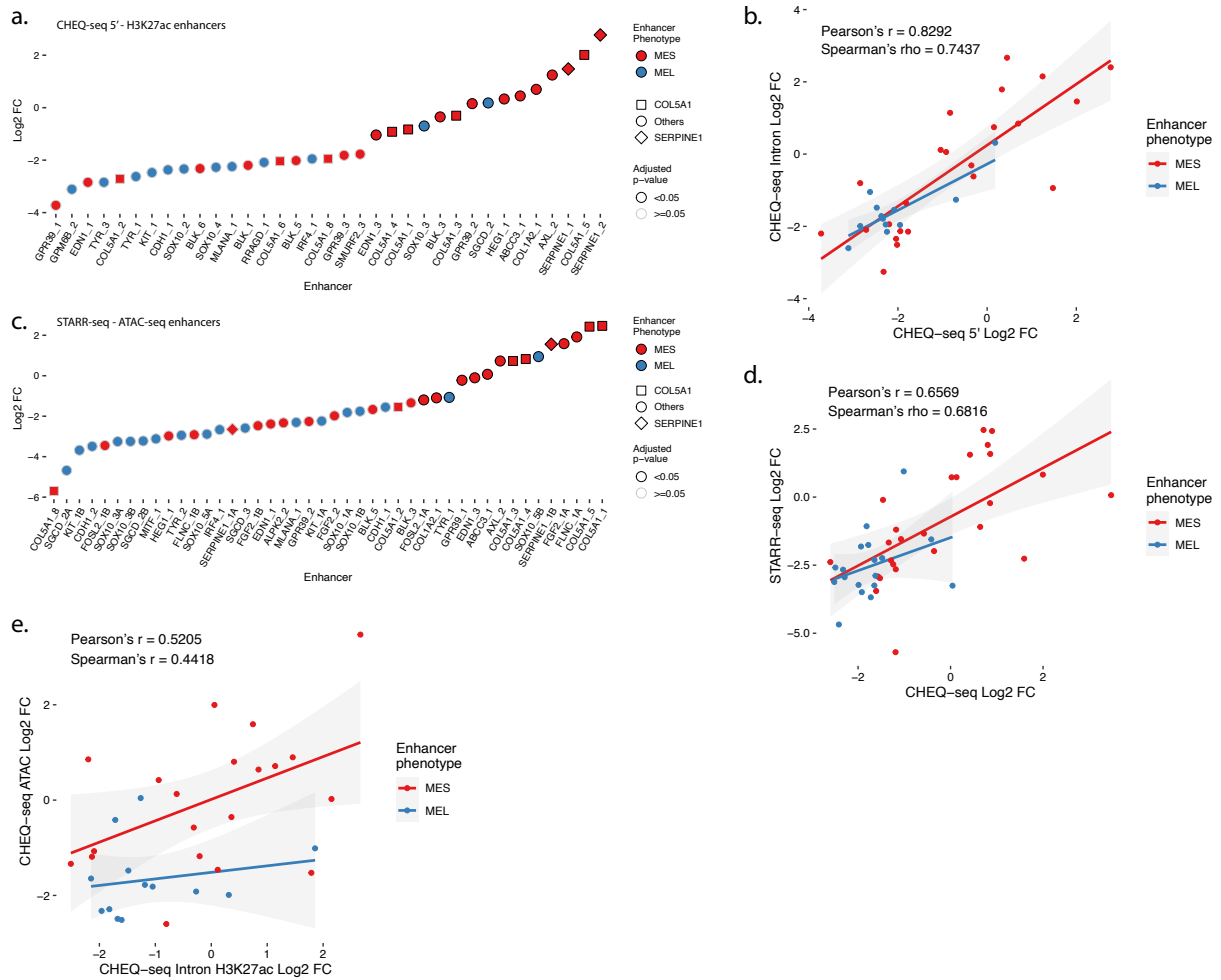

1123  
1124  
1125  
1126  
1127  
1128  
1129  
1130

**Supplementary figure 4: a.**, Enhancer activity profile for the CHEQ-seq intron H3K27ac library in MM029. **b.**, Scatterplot representation of CHEQ-seq intron vs CHEQ-seq 5' H3K27ac library in MM029. **c.**, Enhancer activity profile for the STARR-seq ATAC-seq library in MM029. **d.**, Scatterplot representation of CHEQ-seq vs STARR-seq ATAC-seq library in MM029. **e.**, Scatterplot representation of CHEQ-seq intron H3K27ac library vs CHEQ-seq ATAC-seq library in MM029. For H3K27ac regions with 2 ATAC-seq peaks, the highest value was assigned to the region.

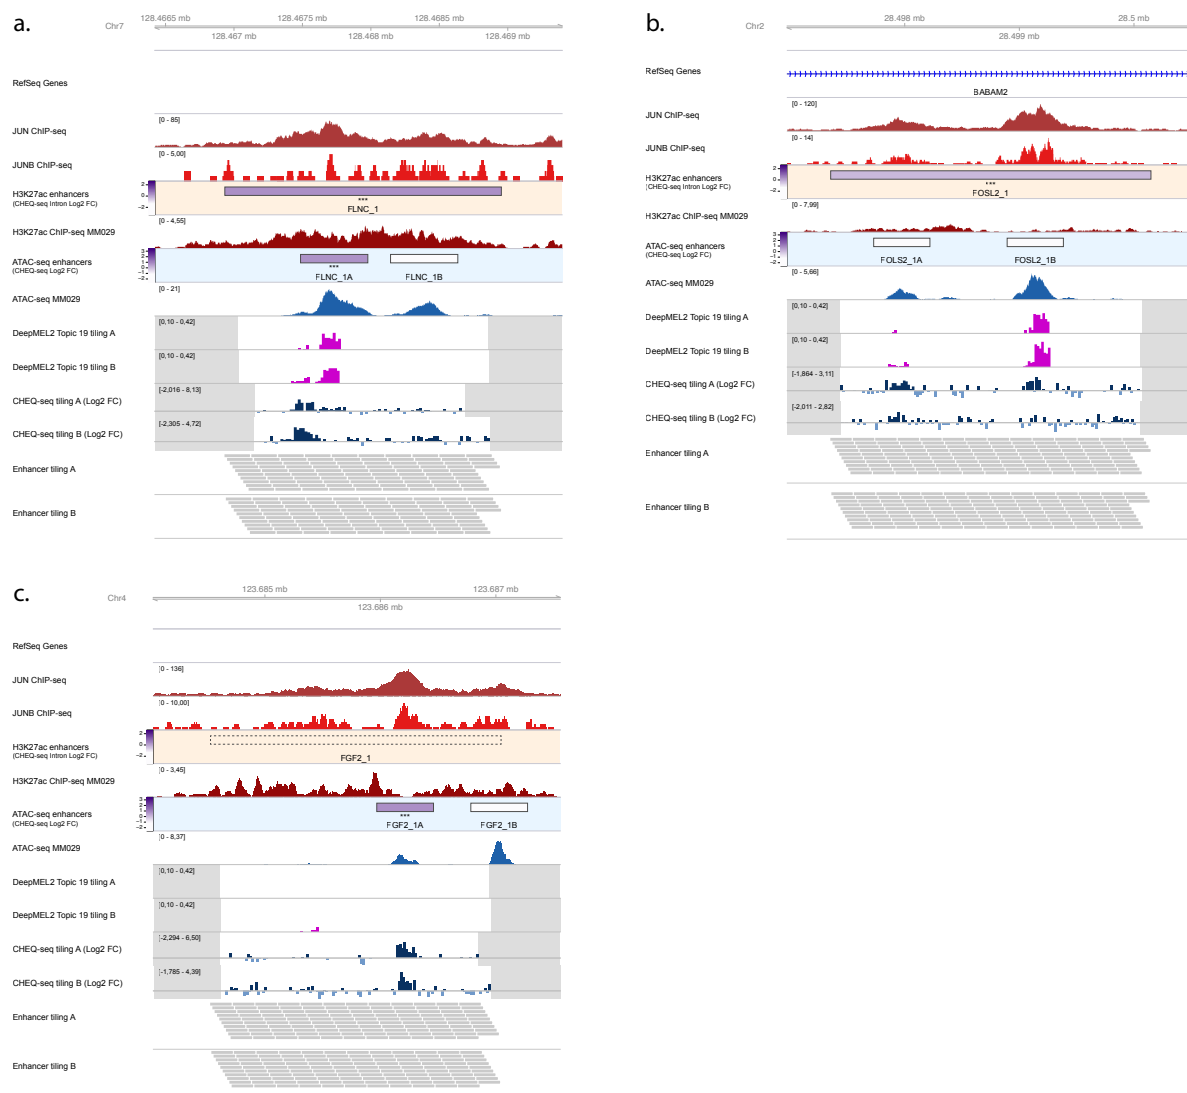

1131  
1132  
1133  
1134  
1135  
1136  
1137

**Supplementary figure 5: a.,** Enhancer activity of *FLNC\_1* (a.), *FOSL2\_1* (b.) and *FGF2\_1* (c.) regions. *JUN* and *JUNB* ChIP-seq, *H3K27ac* ChIP-seq and ATAC-seq for MM029 and DeepMEL2 predictions and CHEQ-seq values of the enhancer tiling are displayed. Dark grey areas are regions not covered by the tiling library. CHEQ-seq activity is visible in the *H3K27ac* enhancers and ATAC-seq enhancers tracks. Benjamini–Hochberg adjusted *p*-values: \*\*\* < 0.001. Dashed box: regions not recovered following synthesis, cloning or MPRA assay.

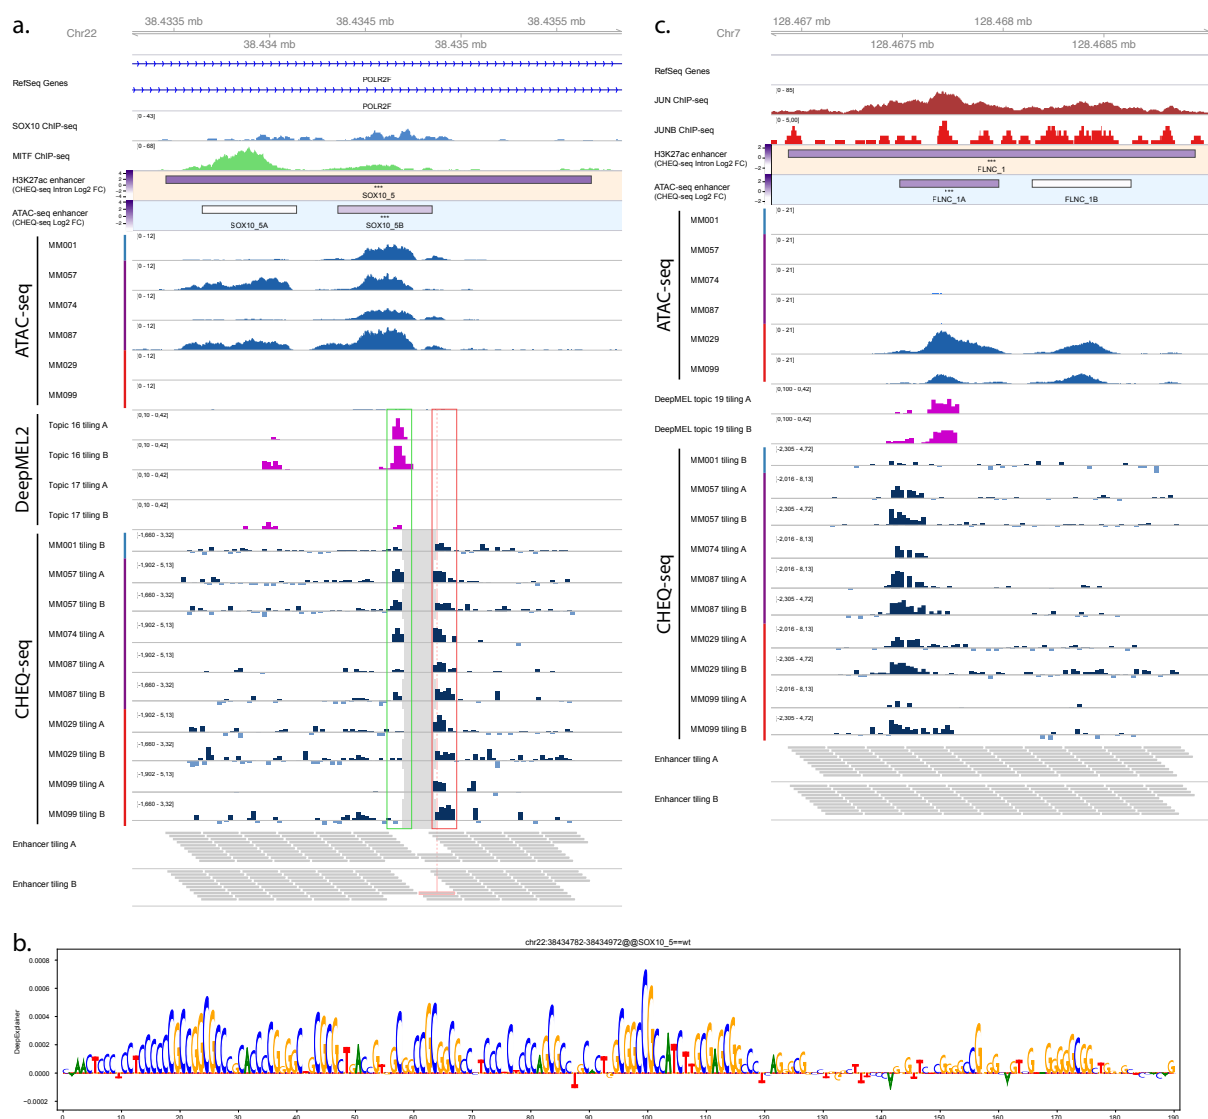

1138  
 1139 **Supplementary figure 6: a.**, Enhancer tiling profile of the SOX10\_5 region across all tested MM lines. MM001  
 1140 activity is shown for the H3K27ac and ATAC-seq regions. The grey area in the CHEQ-seq tiling tracks corresponds  
 1141 to tiles that were not found in the libraries after cloning. The perfect overlap of those missing tiles in libraries A  
 1142 and B suggest that their high GC content caused the synthesis to fail. Bars on the side of the ATAC-seq and CHEQ-  
 1143 seq tracks indicate the phenotype of the cell lines (blue: MEL; purple: MEL intermediate; red: MES). MEL specific  
 1144 and ubiquitous enhancers are highlighted in green and red respectively. **b.**, DeepExplainer profile of the tile  
 1145 highlighted in pink in a. for topic 31 (promoter). **c.**, Enhancer tiling profile of the FLNC\_1 region across all tested  
 1146 MM lines. MM029 activity is shown for the H3K27ac and ATAC-seq regions. Benjamini–Hochberg adjusted p-  
 1147 values: \*\*\* < 0.001.  
 1148

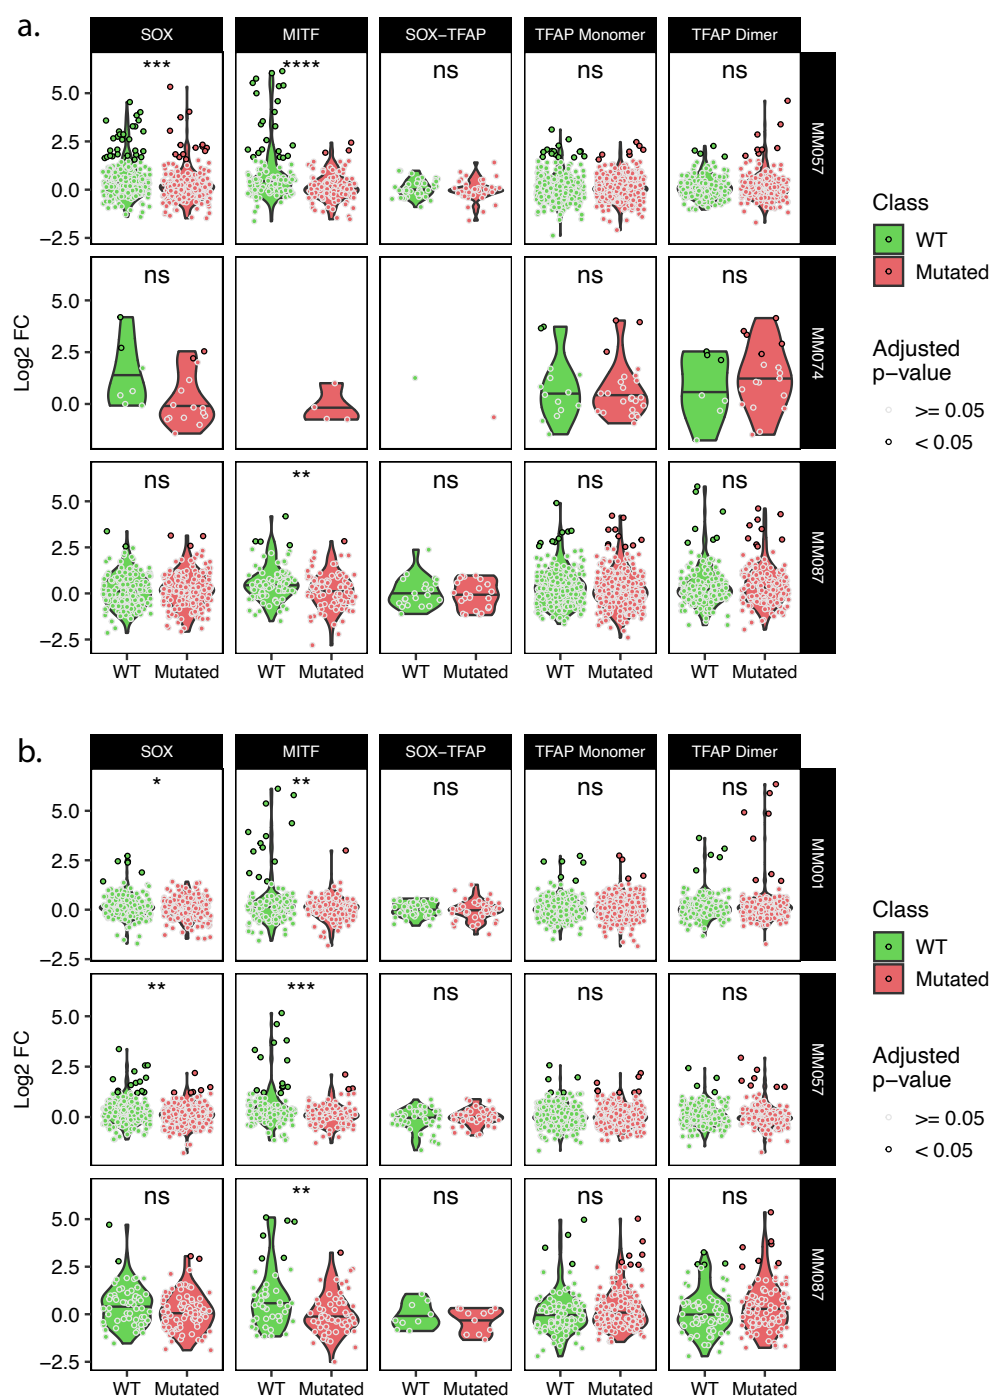

1149  
 1150  
 1151  
 1152

**Supplementary**  
**figure 7: a.-b.**, Expression of wild type and corresponding mutated tiles for the tiling A (a.) and B (b.) libraries. T-test p-values: ns  $> 0.05$ ; \*  $< 0.05$ ; \*\*  $< 0.01$ ; \*\*\*  $< 0.001$ ; \*\*\*\*  $< 0.0001$ .

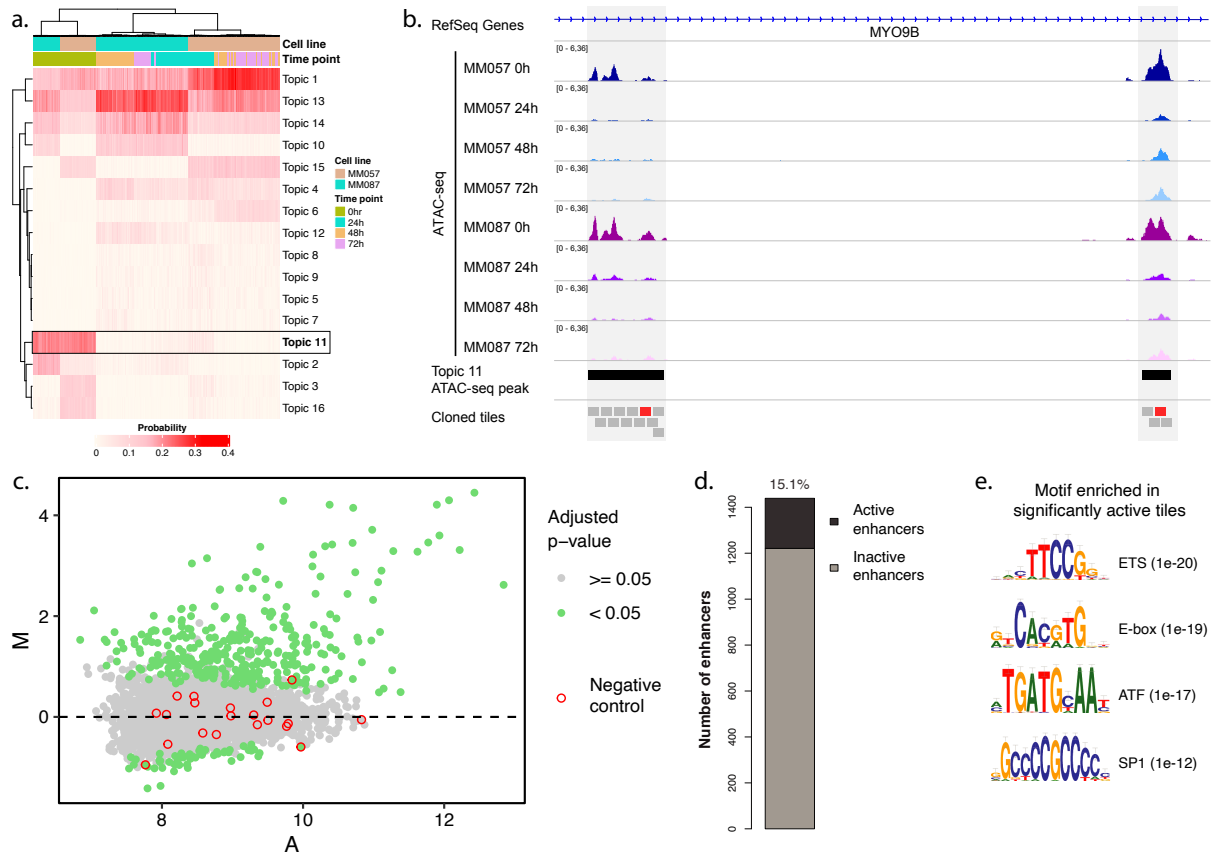

1153  
1154  
1155  
1156  
1157  
1158  
1159  
1160  
1161

**Supplementary figure 8: a.**, Heatmap of topic contribution for each ATAC-seq region over the different cell lines and time points. The highlighted topic 11 contains regions that have reduced predictions following KD. **b.**, ATAC-seq profiles of MM057 and MM087 at 0, 24, 48 and 72h post SOX10-KD. Two topic 11 peaks and 190 bp tiles spanning the enhancers are highlighted by black and grey boxes, respectively. Active tiles are highlighted in red. **c.**, MA plot of all tested tiles in MM087. **d.**, Number of active enhancers. An enhancer is defined as active if at least one of its tiles is active. **e.**, List of the most enriched motifs from the HOMER analysis of active vs inactive enhancers.

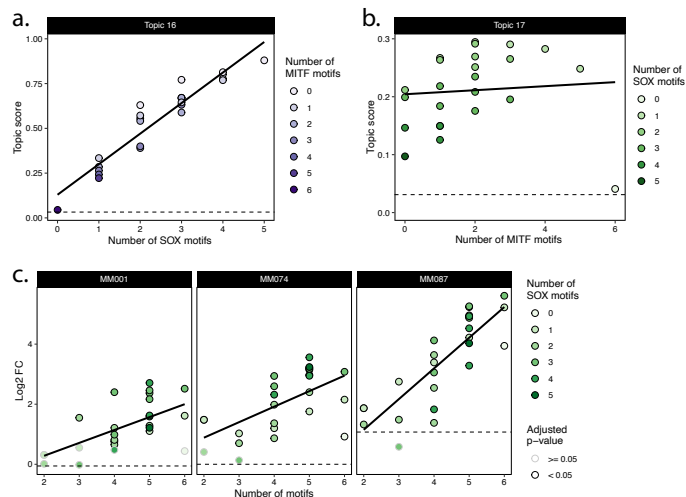

1162  
1163  
1164  
1165  
1166

**Supplementary figure 9: a.**, Synthetic combinations of SOX and MIF motifs DeepMEL2 prediction scores for Topic 16 with scores ordered by the number of SOX motifs in the sequence. **b.**, Synthetic combinations of SOX and MIF motifs DeepMEL2 prediction scores for Topic 17 with scores ordered by the number of MIF motifs in the sequence. **c.**, CHEQ-seq activity of synthetic enhancers in MM001, MM074 and MM087 sorted by the number of



1167 motifs (SOX + MITF) present in the sequence. Dashed line indicates the topic score/log<sub>2</sub> FC value of the  
 1168 background sequence without any motif.  
 1169  
 1170

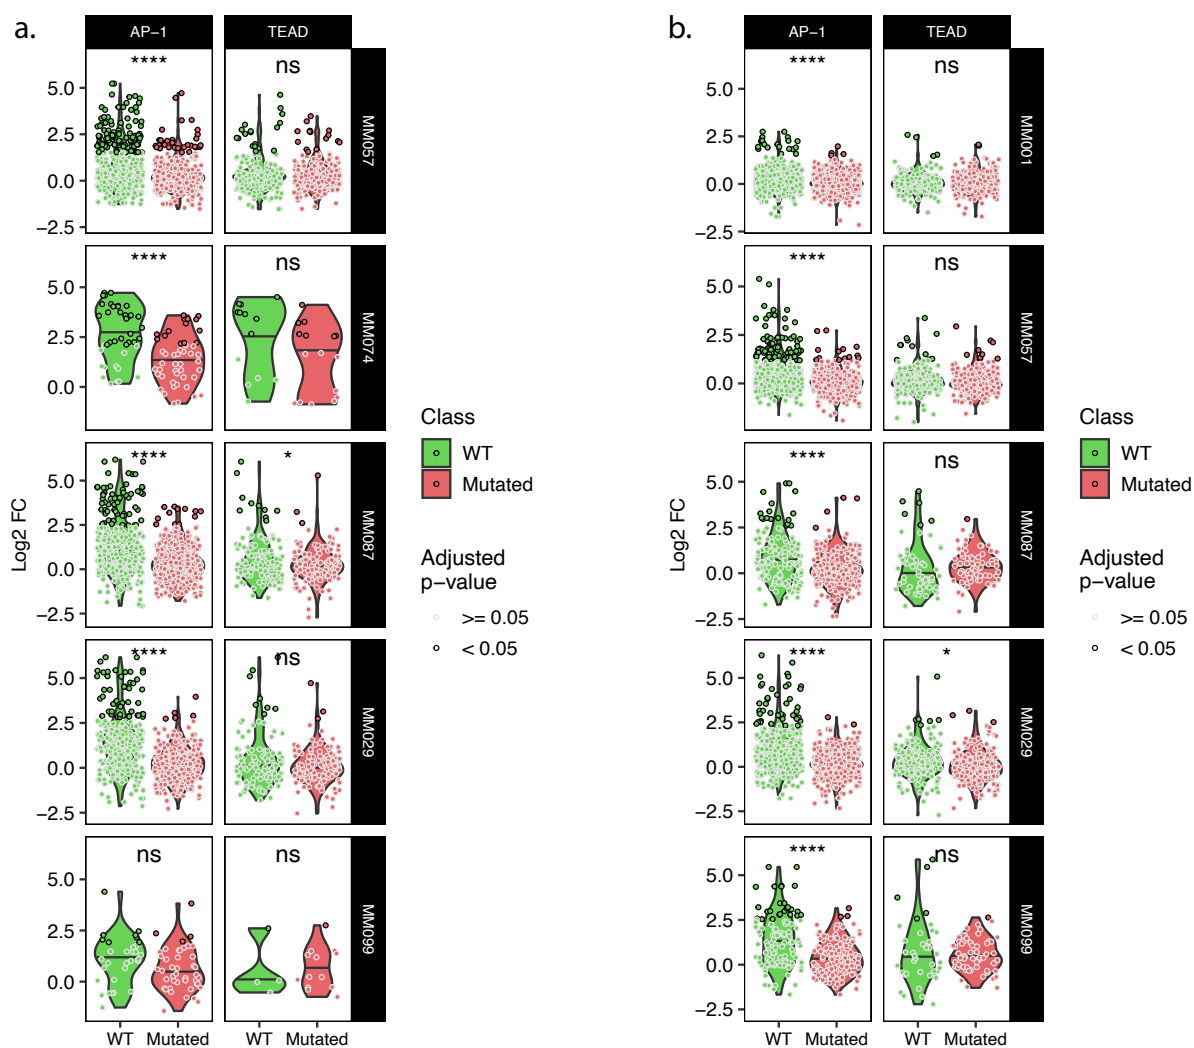

1171  
 1172 **Supplementary figure 10: a.-b.**, Expression of wild type and corresponding mutated tiles for the tiling A (a.) and  
 1173 B (b.) libraries. T-test p-values: ns > 0.05; \* < 0.05; \*\*\*\* < 0.0001.
